1 **Using a collaborative data collection method to update life-history values for snapper and**  
2 **grouper in Indonesia's deep-slope demersal fishery**

3

4 Elle Wibisono<sup>1\*</sup>, Peter Mous<sup>2</sup>, Austin Humphries<sup>1,3</sup>

5 <sup>1</sup> Department of Fisheries, Animal and Veterinary Sciences, University of Rhode Island,

6 Kingston, Rhode Island, USA

7 <sup>2</sup> The Nature Conservancy Indonesia Fisheries Conservation Program, Bali, Indonesia

8 <sup>3</sup> Graduate School of Oceanography, University of Rhode Island, Narragansett, Rhode Island,

9 USA

10

11

12 \*Corresponding author

13 E-mail: [ellewibisono@uri.edu](mailto:ellewibisono@uri.edu) (EW)

14

15

## 16 **Abstract**

17 The deep-slope demersal fishery that targets snapper and grouper species is an important fishery  
18 in Indonesia. Boats operate at depths between 50-500 m using drop lines and bottom long lines.  
19 There are few data, however, on the basic characteristics of the fishery which impedes accurate  
20 stock assessments and the establishment of harvest control rules. To address this gap, we  
21 developed a collaborative data collection and recording system for species and length  
22 composition of commercial catches. The Crew-Operated Data Recording System (CODRS)  
23 involves fishers who take photos of each individual fish in the catch along with a low-cost vessel  
24 tracking system. As it relies on fisher's collaboration and willingness to share data, CODRS is  
25 comparable with a logbook system but enables verification of species identification with greater  
26 spatial resolution. We implemented this system from 2015 to 2018 and gathered data from 251  
27 captains and 2,707 fishing trips, which yielded more than one million individual fish, or 2,680  
28 tons. While there were over 100 species in the fishery, we found that the top five species  
29 accounted for approximately half of the total catch. We also unveiled fifteen species previously  
30 not associated with the fishery due to the fish being eaten on-board, used as bait, or sold prior to  
31 being recorded by traders. Using these data, we updated life-history parameters (length at  
32 maturity, optimum fishing length, asymptotic length, and maximum length) of the top 50 species  
33 in the fishery based on the maximum observed length; this study resulted in higher estimates for  
34 maximum length, most likely due to the high sampling size. For some species, the discrepancies  
35 between different sources were large, whereas others were not. This collaborative data collection  
36 method and findings are useful for scientists and managers interested in conducting length-based  
37 stock assessments to establish harvest control rules for data-poor fisheries.

38

## 39 **Introduction**

40           In multi-species fisheries, conventional fishery-dependent data collection methods (port  
41 sampling, logbooks, and observers) are often viewed as the best way to understand the fishery.  
42 The value of these methods to inform management, however, can be limited depending on the  
43 characteristics of the fishery and thus the quality of the data [1,2]. Applied to tropical fisheries,  
44 many of which have high species diversity, these conventional methods suffer from problems  
45 with species identification and often cannot capture data with sufficient resolution for stock  
46 assessments. For example, port sampling requires a trained enumerator to be present at the dock  
47 the moment a fishing vessel lands fish, which usually poses a logistic challenge. In many parts  
48 of the world this is a problem because the captain is under pressure to offload the boat quickly  
49 and buyers are taking fish from the catch before the enumerator has had time to record the data.  
50 Especially for longer fishing trips, it is difficult to determine the actual fishing grounds if there is  
51 no tracking system [3]. Additionally, logbooks are difficult to enforce, and captains may be  
52 uncomfortable filling in forms that fail to reflect the workflow on board the vessel. In fact,  
53 logbooks are often completed on-shore by agents who take care of the paperwork for a boat [4].  
54 Moreover, captains use local names for fish species, which often represent a group of species and  
55 the meaning of these local names may vary between regions [5]. Other fishery-dependent  
56 methods such as observers can only be applied on larger boats that can accommodate them, are  
57 expensive, require technical expertise, and can be unsafe due to bad working conditions [6].  
58 These challenges are often exacerbated by a low capacity of individuals to analyze the data and  
59 make it useful for management, especially in developing countries.

60           Understanding the factors that characterize the deep-slope demersal fishery in Indonesia  
61 are of global importance because of the wide-reaching influence of the fishery value chain [7].

62 To date, however, this fishery has no accurate catch or effort data, population dynamics of target  
63 species are unknown, and vessel dynamics remain elusive (i.e. size of fleet, fishing location).  
64 Even basic data on species composition are low-resolution or inaccurate. For example,  
65 Indonesian scientific publications often misidentify the most common snapper in the deepwater  
66 demersal fishery, *Lutjanus malabaricus* as *Lutjanus sanguineus*, a species from the eastern part  
67 of the Indian Ocean [e.g., 8–10]. For some of the most common species in this demersal fishery,  
68 taxonomy is still unclear and only recently have researchers concluded that the large *Etelis*  
69 species caught in Indonesian and Australian waters is probably not *Etelis carbunculus*, but a  
70 species that has not been described yet [11]. Furthermore, official catch data from the Indonesian  
71 deep-slope demersal fishery uses species categories such as the “not elsewhere included (nei)”  
72 category that clumps many different species into one group. This categorization does not allow  
73 for stock assessments or analyses of catches based on similar biological and ecological  
74 properties.

75 In data-poor fisheries, length-based assessment methods are a viable way to determine  
76 fishery status and set management benchmarks [12–14]. For Indonesian fisheries specifically,  
77 length-based methods are attractive because of the relative ease to gather data on species and size  
78 composition of the catch [15]. The length-based approach focuses on four important life-history  
79 parameters: length at maturity ( $L_{mat}$ ), optimum fishing length ( $L_{opt}$ ), asymptotic length ( $L_{inf}$ ), and  
80 maximum length ( $L_{max}$ ).  $L_{max}$  is the maximum length a species can attain,  $L_{inf}$  is the mean length  
81 of fish in the cohort at infinite age, and  $L_{mat}$  is the smallest length at which 50% of the  
82 individuals in that cohort is sexually mature.  $L_{opt}$  is the length class with the highest biomass in  
83 an un-fished population. Using these life-history characteristics, catch can be assessed using  
84 three primary indicators: (i) percentage of mature fish in catch (percentage of fish  $> L_{mat}$ ); (ii)

85 percent of specimens with the optimum length in catch (percentage of fish at  $L_{opt}$ ); and (iii)  
86 percentage of ‘mega-spawners’ in catch (percentage of fish  $> L_{opt}$ ) [12]. These three indicators  
87 coupled with exploitation rate, and the spawning potential ratio (SPR) can be used to inform the  
88 stock status [14,15].

89 Unreliable results from previous studies create a data-gap for life history parameter  
90 values for Indonesia’s deep-slope demersal fishery. To determine life history parameters,  
91 previous studies estimate  $L_{inf}$  by using age-length data to fit the Von Bertalanffy growth function  
92 [16,17]. These studies, however, are frequently biased due to small sample sizes, gear selectivity  
93 (not all age classes are represented in the sample), or aging error [18]. Estimation of the Von  
94 Bertalanffy parameters, however, vary depending on the inputted age range [19]. Even in large  
95 sample sizes,  $L_{inf}$  estimates could be erroneous if the growth curve is not appropriate for the  
96 species and/or the gear used for sampling has narrow selectivity [18,20]. In fished populations,  
97 fast-growing young fish and slow-growing old fish are frequently overrepresented in size-age  
98 samples, leading to an underestimation of  $L_{inf}$  [20]. An alternative approach to estimate life-  
99 history parameters is to estimate  $L_{max}$  as the largest specimen from a large sample of fish and use  
100 it to calculate other life-history parameter values based on known relationships between the  
101 parameters [13]. However, this approach has two major challenges in the Indonesian deep-slope  
102 demersal fishery context. First, obtaining length measurements of a large sample of fish is  
103 difficult with port sampling or observers, and impossible with logbooks. Second, because of  
104 problems with species identification, it is difficult to determine whether a very large specimen of  
105 a certain species is accurate without verification.

106 To address these challenges, we developed a collaborative data recording system for  
107 species and length composition of commercial catches that is based on photographic records of

108 the fish in the catch, resulting in verifiable data. This system, referred to as the Crew-Operated  
109 Data Recording System (CODRS), combines simple hand-operated cameras with GPS trackers  
110 to simultaneously record catch, time, and location. Here, we report findings from CODRS, which  
111 included 1,161,659 individual length observations, allowing us to set reliable life-history  
112 parameters for the top 50 species in the fishery based on verifiable estimations of  $L_{\max}$  with large  
113 sample sizes. We also compare the accuracy of CODRS against ledger receipts to see how it  
114 differs from a more traditional fishery-dependent data collection methodology.

115

## 116 **Methods**

### 117 **Study Area**

118 Policy and management of Indonesia's fisheries resources is organized using zones called  
119 Fishery Management Areas (FMA). The deep-slope demersal fishery spans multiple FMAs  
120 across different water bodies in Indonesia. Thus, in 2015 we implemented our data collection  
121 system called Crew-Operated Data Collection System (CODRS) across a wide area that included  
122 Savu and Timor Seas (FMA 573), Java Sea (FMA 712), Makassar Strait (FMA 713), Banda Sea  
123 (FMA 714), Molucca Sea (FMA 715), and the Aru and Arafura Seas (FMA 718; **Fig 1**).

124 Bathymetry of FMA 573, 713, 714, and 715 is characterized by mostly narrow coastal shelves,  
125 seamounts, and deep trenches. Bathymetry of FMA 712 and 718 is mostly comprised of shallow  
126 waters (50 m depth).

127

128 **Fig 1. Map of the eleven Fishery Management Areas (FMA) within Indonesia.** Black lines  
129 denote FMA boundaries.

130

### 131 **Development of the Data Collection System**

132 We recruited captains to participate in CODRS from different FMAs across the full range of the  
133 vessel sizes in the fishery (1 – 86 gross tons or GT). As an incentive for collaboration, we  
134 provided captains with monthly compensation for data collection, scaled to their vessel size  
135 category. In addition to monetary compensation, we also provided captains with a digital camera,  
136 fish measuring board, and a GPS tracking device (SPOT Trace®). We then trained captains how  
137 to take photographs of their catch and ensured the GPS tracking device transmitted the  
138 coordinates every hour. We recruited one technician per 10 vessels participating in the program  
139 (e.g., 3 technicians for 30 vessels). The technicians maintained relationships with captains and  
140 crew, and they received the digital media with the pictures from the captains after each trip. We  
141 also trained research technicians in fish identification using identification guides, frozen  
142 specimens, and photographs (**Fig. 2**).

143

144 **Fig 2. Captain Operated Data Recording System (CODRS) workflow.** The system is a cycle  
145 that begins with recruitment and training of captains and analysts (orange boxes). Data is then  
146 collected at sea (blue box), then transferred to analysts for processing (purple boxes).  
147

148 Data collection for each trip began when the boat left port with the GPS automatically  
149 recording vessel tracks (**Fig. 2**). After reaching the fishing grounds, crew would usually fish for a  
150 couple of hours, temporarily storing fish on the deck or in chillers. Crew would then take  
151 pictures of each fish during the packing process of putting the fish in the hold: one crew member  
152 collected fish from the deck and put it on the measuring board, where another crew member took  
153 the picture. Thereafter, the fish were stored in the hold. For very small fishing vessels (<5 GT),  
154 the process was slightly different: they took pictures upon reaching land instead of at sea.  
155 Combined with the location GPS data, the timestamps of the photographs were recorded and  
156 used to match each picture with an approximate position.

157           At the end of each fishing trip, which varied between two days and two months  
158 depending on vessel size, captains transferred the memory card containing the photographs of  
159 their catch to the research technicians at port. One research technician then identified fish species  
160 and another one determined the total length (TL; cm) from the pictures. An experienced third  
161 research technician examined the species identification and TL results for accuracy. A senior  
162 fisheries scientist verified the pictures of any specimens that exceed the largest fish in our  
163 database. To determine weight (kg), allometric length-weight relationships were obtained from  
164 the literature (**S1 Table**). When no values were found for a species, we used morphologically  
165 similar species to obtain the length-weight coefficients.

166           Catches that were abnormally low, had low quality photographs and/or only represented  
167 the first day of fishing from a multi-day fishing trip were flagged as incomplete and removed  
168 from the dataset. Catch and location data were then uploaded to a database (online) where vessel  
169 owners, captains, and researchers had access to the contents, each with different viewing  
170 privileges. For instance, captains were not able to see the fishing grounds and corresponding  
171 catches of other captains, but researchers were. Based on the quality of the photographs, research  
172 technicians provided feedback to the captains and/or crew to improve data quality on subsequent  
173 trips (**Fig. 2**).

174

## 175 **Data Accuracy and Catch Composition**

176           Receipts or ledgers represented an estimate of total catch weight that was independent  
177 from CODRS. Other studies [e.g., 23] have found that sales records represent a reliable estimate  
178 of the total catch weight. To test this hypothesis, we collected receipts from fish traders that  
179 purchased fish from our partner vessels from August to November 2017. We compared these



180 data to catch estimates from the CODRS system using paired t-tests and linear regression. Data  
181 were inspected for normality and homogeneity of variance using a Shapiro-Wilks test. We used  
182 descriptive comparisons to determine the most frequently caught species in this fishery by  
183 frequency and biomass.

184

## 185 **Updating Life History Parameters**

186 Determining  $L_{\max}$  values started with filtering our database for the largest fish of each  
187 species ( $L_{x\text{-CODRS}}$ ). Based on these values, we validated the findings by comparing  $L_{x\text{-CODRS}}$  with  
188  $L_{\max}$  documented in previous research and/or angling trophy photographs. We followed certain  
189 standards while conducting the literature review and we accepted literature values only if: (i) the  
190 study had a large sample size ( $n > 1000$ ), (ii) large size range (i.e. older age classes were  
191 represented), (iii) was conducted at a comparable latitude to Indonesia, and (iv) had verifiable  
192 species identification (i.e., photograph available, species is distinct and less likely to be  
193 misidentified, species exists in the area) due to the high probability of misidentification. For  
194 studies that only estimated  $L_{\text{inf}}$  and not  $L_{\max}$ , we converted  $L_{\text{inf}}$  into  $L_{\max}$  using the following  
195 conversion:  $L_{\max} = L_{\text{inf}} * 1.1$  [24]. Also, if fish length from literature was recorded as fork length  
196 or standard length, we converted it into total length using published conversion ratios. If  $L_{x\text{-CODRS}}$   
197 was chosen as the new  $L_{\max}$  for a species, then the photograph was reviewed by two or more  
198 research technicians and a senior fishery scientist to ensure correct species identification.

199 To further verify our updated  $L_{\max}$  values, we searched the Internet for angling  
200 photographs for each species from comparable latitudes using key words that contained: (i)  
201 scientific name of the species of interest, (ii) scientific name of similar species, or (iii) common  
202 names from different regions. We then identified the catch species and searched for

203 accompanying descriptive text to determine the catch area. To determine the estimated length of  
204 the fish, we used reference objects in the photograph (usually the angler's hands) and measured  
205 the TL of the fish. Even though this approach may be less accurate, the photographs gave us a  
206 representation of the possible upper ranges of fish sizes that can help assess the plausibility of  
207 published  $L_{inf}$  or  $L_{max}$  values and the values from our CODRS database. We also compared  $L_{mat}$   
208 values from our calculation with maturity studies that determined the length at which 50% of the  
209 population matures (of the top 15 species in the catch). We excluded studies that published  
210 values for length at first maturity. We compared  $L_{mat}$  values from areas with similar latitudes  
211 ( $15^{\circ}$  S –  $15^{\circ}$  N); when not available, we included studies from other latitudes.

212 We calculated  $L_{inf}$ ,  $L_{mat}$ , and  $L_{opt}$  using known relationships between the parameters and  
213 the accepted  $L_{max}$  value as described above. For all families we used  $L_{inf} = 0.9 * L_{max}$  [22].  $L_{mat}$   
214 calculations differed based on the family – for Lutjanidae,  $L_{mat} = 0.59 * L_{inf}$ ; for Epinephelidae,  
215  $L_{mat} = 0.46 * L_{inf}$  [23]. For other families,  $L_{mat} = 0.5 * L_{inf}$  [24]. For all families we determined  
216  $L_{opt} = 1.33 * L_{mat}$  [25]. We then validated the results by comparing  $L_{mat}$  values with published  
217 values. We used  $L_{mat}$  estimates from histological techniques as a point of comparison because  
218 biological studies on maturation have been shown to be more robust than  $L_{inf}$  studies [26].

219

## 220 **Results and Discussion**

### 221 **CODRS as a Method**

222 We worked with a total of 251 captains between October 2015 and August 2018 to  
223 implement the Crew Operated Data Recording System (CODRS) in Indonesia. These captains  
224 used drop lines, bottom longlines, or a mixture of both gears. Through CODRS implementation,  
225 we obtained data from 2,707 fishing trips, which yielded 1,161,659 individual fish or 2,680 tons

226 of catch. Vessels ranged from one to 86 GT in size. Selection of captains was roughly  
227 proportional to composition of the fleet in terms of vessel size, the Fishery Management Areas  
228 where the boat normally operates, and gear type. Because willingness of the captains to  
229 participate in the CODRS program also played an important role, catches recorded with CODRS  
230 are only roughly proportional to composition of the fleet. The dataset collected in this study  
231 includes the largest specimen ever recorded in the scientific literature and in publications on  
232 angling records for each of the 25 most common species. This is a result of the efficiency of a  
233 collaborative data collection system that involves hundreds of fishers who were able to capture  
234 verifiable data.

235 We used total weights from catch receipts as our control dataset to compare with  
236 CODRS. We obtained receipts from 41 captains with boats <30 GT, and from 3 captains with  
237 boats >30 GT. Because of the small sample size for large boats >30 GT, we did not use the data  
238 in our analysis. We found a statistically significant difference for the total catch weight per trip  
239 between data collected from receipts and CODRS ( $p < 0.001$ ,  $t = 5.5243$ ). Our CODRS dataset  
240 also recorded more fish per catch than the receipts and this became more pronounced as the catch  
241 got larger (**Fig. 3**). The estimates of total catch by CODRS appeared higher than estimates of  
242 total catch from the receipts and the variation was substantial. Receipts that indicated a total  
243 catch in the 10-500 kg range were associated with CODRS data indicating a catch of up to 1.5  
244 metric tons. In the 500 kg - 2,500 kg per trip category, CODRS appeared to indicate a total catch  
245 that was around 50% lower than the figures indicated on the receipts. This is in contrast to the  
246 largest catches (> 2,500 kg) where there was a high correlation between CODRS and the  
247 receipts. This discrepancy was due to some fish being used as bait, eaten on-board, sold directly

248 to individual buyers (without any receipts), or even “cheating” (rigging weighing scales to record  
249 lower weights).

250 It remains speculative which method provided the most accurate data for each landing,  
251 but it is remarkable that even a relatively simple observation such as total catch may easily be  
252 20-50% higher or lower depending on the method used (ledgers versus CODRS). The problem is  
253 not with the estimation of the amount of fish in the hold at any one time. Rather, the problem is  
254 with the operational practices that affect the amount of fish in the hold as compared to the  
255 amount of fish that was actually caught. The implication is that sources of variation such as  
256 (unobserved) offloading at sea, reporting by fishers of "commercial" catch vs. catch for the local  
257 market, consumption by crew, etc., may be orders of magnitude higher than measurement errors  
258 in total catch weight at the moment that the boat is landing. These observations serve as further  
259 evidence of the importance of an on-board data collection system for this fishery as opposed to  
260 post-landing data collection methods.

261

262 **Fig 3. Total catch weight comparison between receipts and CODRS (Crew-Operated Data**  
263 **Recording System).** Black line denotes 1:1 ratio between receipts and CODRS total weight;  
264 blue line denotes fitted linear regression with 95% confidence interval in grey.  
265

266 The cost to implement CODRS per year was approximately \$3,600- \$6,300 per vessel  
267 (depending on vessel size). This is substantially more expensive than that of logbooks (\$42) but  
268 not observers (\$2,700 per observer trip). However, given the amount of data obtained from  
269 CODRS and its accuracy, the value of this method far exceeds that of other methods. Logbooks,  
270 observers, and CODRS all require fishers to voluntarily provide unbiased, accurate data, so this  
271 caveat is not exclusive to one method over another. One place where our CODRS method is  
272 particularly unique and useful is the detailed effort data it records for each fishing trip. Using the

273 CODRS dataset, researchers can match GPS coordinate dates from the tracking device to the  
274 date on catch photographs, verifying time and location of catch. These parameters help to  
275 standardize catch per unit effort [27]. Researchers can also filter GPS coordinates to map fishing  
276 areas, determine the spatial distribution of fish species, analyze vessel dynamics, and determine  
277 management implications of different movement patterns [28–31].

278 In addition to providing catch and effort data, CODRS as a collaborative system could act  
279 as a precursor to co-management of a fishery [32,33]. Collaborative approaches to fisheries  
280 management have gained traction in recent years as a potential solution to data-poor and open-  
281 access tropical fisheries such as those found across Indonesia [34]. This approach relies on the  
282 sharing of power and knowledge between policy-makers, researchers, and resource-users [35]. In  
283 fact, success has been shown in similar fisheries to this one which fostered collaboration and data  
284 collection for stock assessments [32,36]. Walsh et al (2005) found that self-reporting in the  
285 Hawaii-based longline fishery for billfish can provide reliable data, provided that species  
286 identification is improved [21]. Our work on CODRS, which can be understood as a self-  
287 reporting system, corroborates this notion. In addition, CODRS resolves the species  
288 identification issue highlighted by Walsh et al. [21]. However, similar to the implementation of  
289 collaborative data collection efforts in other fisheries, communication, monitoring, and  
290 enforcement of the system is imperative to ensure data accuracy.

291 An advantage of CODRS over conventional data collection systems (i.e., logbooks,  
292 observers) is the ability to gather a high volume of data in a short period of time. However,  
293 despite the expedited process of data collection, the system's success still relied on intensive data  
294 analysis, training, and monitoring captains. Thus, pre- and post-data collection efforts remain  
295 high and unavoidable given the multi-species nature of the fishery. Constant monitoring as a

296 form of feedback is necessary to ensure compliance with the monitoring protocol [37]. In the  
297 context of the CODRS program, the most important issues that we had to address were: (i)  
298 captains needed to take photographs of their entire catch and not just a portion (including sharks  
299 and other bycatch) or their perception of the targeted catch; (ii) captains or their designated crew  
300 needed to take photographs of sufficient quality (pictures were not blurry, camera was angled  
301 properly); and (iii) captains needed to position fish on the measuring board properly. If these  
302 problems were not identified by the trained technicians, it would have led to poor data quality  
303 and misrepresentation of the catch.

304 We expect that technological improvements will enhance scalability and applicability of  
305 CODRS to other fisheries. This may include things such access to cheaper high-quality cameras  
306 and an automated fish identification system [2]. Currently, photographs can be blurry especially  
307 if the photograph were taken in rough seas and/or during the nighttime. We expect that  
308 automation of image analysis through artificial intelligence will expedite the species  
309 identification process and remove many of the technical barriers to data analysis [38]. Although  
310 still in development, these technologies should soon be available and CODRS would be  
311 improved significantly, both in accuracy and cost.

312

## 313 **Catch Composition**

314 Our findings show that the deep-slope demersal fishery exploited more than 100 species  
315 of fish (**S2 Table**). Half of the total catch, however, belonged to only five species (**Table 1**). The  
316 top 15 species by frequency and weight represented more than 70% of the total catch. *Lutjanus*  
317 *malabaricus* was the most captured species by both frequency and biomass. It contributed 19%  
318 to the total catch composition. Smaller species, such as *Epinephelus areolatus* were frequently

319 caught, however, did not represent a large volume. Most of the catch belonged to the family  
320 Lutjanidae (snappers), subfamily Etelinae (*Pristipomoides multidentis*, *Pristipomoides typus*,  
321 *Pristipomoides filamentosus*, *Aphareus rutilans*, *Etelis sp.*, and *Prisipomoides sieboldi*). The  
322 most frequently caught species in the fishery also represented the species with highest reported  
323 economic importance [39].

324

325 **Table 1. Top 15 most frequently caught species in the deep-slope demersal fishery.**

| Species rank by frequency          | Count  |
|------------------------------------|--------|
| <i>Lutjanus malabaricus</i>        | 243479 |
| <i>Pristipomoides multidentis</i>  | 222345 |
| <i>Pristipomoides typus</i>        | 121017 |
| <i>Epinephelus areolatus</i>       | 99947  |
| <i>Lutjanus erythropterus</i>      | 53920  |
| <i>Atrobuca brevis</i>             | 48919  |
| <i>Pristipomoides filamentosus</i> | 48627  |
| <i>Lethrinus laticaudis</i>        | 42011  |
| <i>Lutjanus vitta</i>              | 37832  |
| <i>Aphareus rutilans</i>           | 36722  |
| <i>Paracaesio kusakarii</i>        | 32127  |
| <i>Etelis sp.</i>                  | 29213  |

|                         |       |
|-------------------------|-------|
| <i>Lutjanus sebae</i>   | 27329 |
| <i>Pinjalo lewisi</i>   | 22972 |
| <i>Etelis coruscans</i> | 21963 |

326

| <b>Species rank by weight</b>      | <b>Weight (tons)</b> |
|------------------------------------|----------------------|
| <i>Lutjanus malabaricus</i>        | 647                  |
| <i>Pristipomoides multidentis</i>  | 586                  |
| <i>Aphareus rutilans</i>           | 176                  |
| <i>Pristipomoides typus</i>        | 150                  |
| <i>Etelis sp.</i>                  | 135                  |
| <i>Pristipomoides filamentosus</i> | 97.3                 |
| <i>Lutjanus erythropterus</i>      | 83.2                 |
| <i>Lethrinus laticaudis</i>        | 80.0                 |
| <i>Paracaesio kusakarii</i>        | 78.4                 |
| <i>Etelis coruscans</i>            | 69.9                 |
| <i>Lutjanus sebae</i>              | 64.5                 |
| <i>Epinephelus areolatus</i>       | 46.1                 |
| <i>Atrobucca brevis</i>            | 42.8                 |



|                                 |      |
|---------------------------------|------|
| <i>Gymnocranius grandoculis</i> | 41.4 |
| <i>Epinephelus coioides</i>     | 39.6 |

327

328           Through our on-board data recording system, CODRS, we discovered 15 additional  
329 species that were not previously recorded in this fishery. These non-target catch species were  
330 either consumed, used as bait, salted on board or sold directly to the local (“wet”) market  
331 (P.Mous personal observation). This previously unreported catch consists of several species of  
332 Carangidae (*Carangoides coeruleopinnatus*, *Carangoides fulvoguttatus*, *Carangoides*  
333 *malabaricus*, *Carangoides chrysophrys*, *Carangoides gymnotethus*, *Caranx bucculentus*,  
334 *Caranx tille*), *Elagatis bipinnulata*, *Diagramma labiosum*, *Diagramma pictum*, *Pomadasys*  
335 *kaakan*, *Sphyraena barracuda*, *Sphyraena forsteri*, *Sphyraena putnamae*, and *Protonibea*  
336 *diacanthus*. In the three years of CODRS data collection, the total catch weight of these 15  
337 species amounted to 134,470 tons. The prevalence of catches that was never offloaded and  
338 recorded on shore affirms the importance of having data collection on-board. Not only is it  
339 logistically impossible to have several enumerators or staff on shore to record catches, but the  
340 resulting data will also miss these species [5].

341           The dominant species in the catches of this Indonesian fishery are found throughout the  
342 deep-slope demersal fishery in the Pacific Ocean [23,40]. However, there are differences in catch  
343 composition and properties of each species throughout the Indo-Pacific. *Etelis sp.* was recently  
344 identified as a separate species from *Etelis carbunculus* and is found throughout the Indo-Pacific  
345 but not found in Hawaii [11,41]. In Indonesia, the ratio of *Etelis sp.* and *E. carbunculus* by count  
346 was 66 to 1 (**S2 Table**), where the average length of *Etelis sp.* in the catch was 61 cm and that of  
347 *E. carbunculus* was 41 cm. The Indonesian *Pristipomoides multidens* (the second most

348 frequently caught species) stock does not share genetic connectivity with the adjacent Australian  
349 population [42]. *P. multidentis* even has distinct genetic subdivisions within Indonesia [42]. In  
350 addition, life-history characteristics of species such as *E. carbunculus* differs between areas due  
351 to its latitudinal gradient, and ambient water temperature [41].

352 Different habitat and depth preferences for the major species in the catch affects species  
353 distribution in accordance with the diverse bathymetry of the area. Droplines and bottom  
354 longlines operated at different depths and habitats; dropline vessels fished at greater depths than  
355 the bottom longline. For example, *Etelis sp.*, which has a depth preference between 200 to 300 m  
356 [43], were predominantly found in dropline catches. Longline vessels frequently caught non-reef  
357 species such as *Pomadasys kaakan*, *Diagramma pictum*, and *Diagramma labiosum*, which were  
358 rarely found in dropline catches. *Etelis sp.* and *P. filamentosus* prefer high-relief structures, such  
359 as steep drop-offs [44], and were thus captured more commonly in the dropline catches.  
360 Understanding different depth and habitat preferences of the top species in the fishery before and  
361 after maturity, along with gear-selectivity, can help inform sustainable fisheries management  
362 options such as spatial closures.

363

## 364 **Updating Maximum Length**

365 Through the large number of samples and large size range per species in the CODRS  
366 database, we were able to use simple length data to derive updated  $L_{\max}$  values. Our CODRS  
367 method demonstrated that it can serve as an accurate way to estimate life-history parameters by  
368 treating  $L_{\max}$  and  $L_{\text{inf}}$  as biological parameters instead of a curve fitting parameter. This method  
369 was supported by robust length-frequency distributions of each species, which indicated that  
370 using  $L_{x\text{-CODRS}}$  to determine  $L_{\max}$  was not an ‘anomalous’ fish; as illustrated through the length-

371 frequency distributions of the top four species, large sizes were less prevalent, but not anomalous  
372 (**Fig 4**). Photographs of  $L_{x-CODRS}$  act as a verifiable evidence of the lengths that these species can  
373 attain. In addition, large size ranges in the database also ensured that the data collection had  
374 broad selectivity from multiple gear types and multiple vessel sizes.

375 **Fig. 4. Length frequency distributions of the top six most frequently caught species in the**  
376 **deep-slope demersal fishery (*Lutjanus malabaricus*, *Prisipomoides multidens*, *Pristipomoides***  
377 ***typus*, *Epinephelus areolatus*, *Lutjanus erythropterus*, and *Atrobucca brevis*).** Vertical lines  
378 indicate different life history parameters. Red dashed lines represent length at maturity ( $L_{mat}$ );  
379 orange dashed lines represent the length at optimum yield ( $L_{opt}$ ); green dashed lines represent  
380 asymptotic length ( $L_{inf}$ ); and the blue dashed lines represent maximum length ( $L_{max}$ ). Under each  
381 length-frequency distribution is a photograph from the Crew Operated Data Recording System  
382 database of the largest fish ( $L_{x-CODRS}$ ).  
383

384  $L_{x-CODRS}$  contributed new verifiable maximum lengths ( $L_{max}$ ) for the top 50 species in the  
385 fishery (**Table 2**). We did not find any  $L_{max}$  values from the literature or angling photographs that  
386 satisfied our criteria and therefore none of the updated  $L_{max}$  values are based on these data  
387 sources. Based on the  $L_{x-CODRS}$  lengths from our data, we compiled new  $L_{max}$  values that  
388 corrected for past over- or underestimation, then used this to calculate other life history  
389 parameter values ( $L_{inf}$ ,  $L_{mat}$ ,  $L_{opt}$ ). For some species, the discrepancies in parameter values  
390 between different sources were large, whereas others were not. For example, previous studies of  
391 *P. multidens* estimated a range of  $L_{inf}$  between 67 and 75 cm [45,46]. As a consequence, the  $L_{mat}$   
392 would be underestimated by 16 to 24 cm according to our data. Thus, analyzing previous  
393 research on the life-history parameters of the deep-slope demersal species required careful  
394 consideration of potential mis-identifications, or even different definitions of similar parameters.  
395 For example, some studies reported  $L_{mat}$  as the length at first maturity, whereas other studies  
396 reported  $L_{mat}$  as the length at which 50% of the population is mature [47,48].  
397

398 **Table 2. Life history parameters (Lmat, Lopt, Linf, and Lmax) and Lx-CODRS (maximum**  
 399 **length recorded through the Crew-Operated Data Recording System) of the top 50 most**  
 400 **frequently caught species in the deep-slope demersal fishery.**

401

| <b>Fish Species</b>                | <b>Lmat<br/>(cm)</b> | <b>Lopt<br/>(cm)</b> | <b>Linf<br/>(cm)</b> | <b>Lmax<br/>(cm)</b> | <b>Lx-CODRS<br/>(cm)</b> |
|------------------------------------|----------------------|----------------------|----------------------|----------------------|--------------------------|
| <i>Lutjanus malabaricus</i>        | 50                   | 67                   | 86                   | 95                   | 94                       |
| <i>Pristipomoides multidentis</i>  | 50                   | 67                   | 86                   | 95                   | 91                       |
| <i>Pristipomoides typus</i>        | 45                   | 60                   | 77                   | 85                   | 85                       |
| <i>Epinephelus areolatus</i>       | 21                   | 28                   | 45                   | 50                   | 50                       |
| <i>Pristipomoides filamentosus</i> | 48                   | 64                   | 81                   | 90                   | 88                       |
| <i>Lethrinus laticaudis</i>        | 29                   | 39                   | 59                   | 65                   | 63                       |
| <i>Lutjanus erythropterus</i>      | 37                   | 49                   | 63                   | 70                   | 70                       |
| <i>Aphareus rutilans</i>           | 61                   | 81                   | 104                  | 115                  | 115                      |
| <i>Paracaesio kusakarii</i>        | 45                   | 60                   | 77                   | 85                   | 85                       |
| <i>Etelis sp.</i>                  | 66                   | 88                   | 113                  | 125                  | 125                      |
| <i>Lutjanus vitta</i>              | 24                   | 32                   | 41                   | 45                   | 43                       |
| <i>Lutjanus sebae</i>              | 53                   | 71                   | 90                   | 100                  | 96                       |
| <i>Pristipomoides sieboldii</i>    | 29                   | 39                   | 50                   | 55                   | 55                       |

|                                   |    |    |     |     |     |
|-----------------------------------|----|----|-----|-----|-----|
| <i>Pinjalo lewisi</i>             | 32 | 42 | 54  | 60  | 58  |
| <i>Etelis coruscans</i>           | 64 | 85 | 108 | 120 | 120 |
| <i>Gymnocranius grandoculis</i>   | 36 | 48 | 72  | 80  | 76  |
| <i>Lutjanus timorensis</i>        | 32 | 42 | 54  | 60  | 60  |
| <i>Diagramma pictum</i>           | 38 | 51 | 77  | 85  | 81  |
| <i>Paracaesio stonei</i>          | 37 | 49 | 63  | 70  | 70  |
| <i>Pomadasys kaakan</i>           | 29 | 39 | 59  | 65  | 64  |
| <i>Wattsia mossambica</i>         | 27 | 36 | 54  | 60  | 60  |
| <i>Lethrinus lentjan</i>          | 25 | 33 | 50  | 55  | 55  |
| <i>Lethrinus amboinensis</i>      | 27 | 36 | 54  | 60  | 57  |
| <i>Lutjanus gibbus</i>            | 27 | 35 | 45  | 50  | 49  |
| <i>Protonibea diacanthus</i>      | 61 | 81 | 122 | 135 | 130 |
| <i>Etelis radiosus</i>            | 61 | 81 | 104 | 115 | 115 |
| <i>Carangoides chrysophrys</i>    | 36 | 48 | 72  | 80  | 80  |
| <i>Lethrinus rubrioperculatus</i> | 20 | 27 | 41  | 45  | 45  |
| <i>Caranx bucculentus</i>         | 34 | 45 | 68  | 75  | 72  |
| <i>Lutjanus argentimaculatus</i>  | 50 | 67 | 86  | 95  | 95  |

|                                |    |    |     |     |     |
|--------------------------------|----|----|-----|-----|-----|
| <i>Pinjalo pinjalo</i>         | 42 | 56 | 72  | 80  | 77  |
| <i>Cephalopholis sonnerati</i> | 23 | 30 | 50  | 55  | 55  |
| <i>Caranx sexfasciatus</i>     | 38 | 51 | 77  | 85  | 85  |
| <i>Paracaesio gonzalesi</i>    | 29 | 39 | 50  | 55  | 51  |
| <i>Epinephelus morrhua</i>     | 31 | 41 | 68  | 75  | 71  |
| <i>Erythrocles schlegelii</i>  | 41 | 54 | 81  | 90  | 90  |
| <i>Aprion virescens</i>        | 58 | 78 | 99  | 110 | 107 |
| <i>Epinephelus coioides</i>    | 50 | 66 | 108 | 120 | 119 |
| <i>Seriola rivoliana</i>       | 61 | 81 | 122 | 135 | 132 |
| <i>Lutjanus johnii</i>         | 48 | 64 | 81  | 90  | 90  |
| <i>Glaucosoma buergeri</i>     | 32 | 42 | 63  | 70  | 70  |
| <i>Lutjanus russelli</i>       | 29 | 39 | 50  | 55  | 53  |
| <i>Lutjanus bohar</i>          | 48 | 64 | 81  | 90  | 88  |
| <i>Diagramma labiosum</i>      | 36 | 48 | 72  | 80  | 78  |
| <i>Lethrinus olivaceus</i>     | 45 | 60 | 90  | 100 | 97  |
| <i>Paracaesio xanthura</i>     | 29 | 39 | 50  | 55  | 52  |
| <i>Lutjanus bouton</i>         | 19 | 25 | 32  | 35  | 33  |

|                                  |    |    |    |    |    |
|----------------------------------|----|----|----|----|----|
| <i>Epinephelus amblycephalus</i> | 33 | 44 | 72 | 80 | 78 |
| <i>Epinephelus bleekeri</i>      | 33 | 44 | 72 | 80 | 79 |

402

403

404 We found a disparity between available information in the literature and abundance of the  
405 species in the catch. For example, *P. typus*, the third most abundant species in the catch, had  
406 almost no previous studies on its life history parameters. This species is similar to and sometimes  
407 mixed with *P. multidentis* during trade [49]. However, we believe that *P. typus* grows to a smaller  
408  $L_{\max}$  than *P. multidentis*. The largest fish in our sample was larger than any other published values  
409 or photographs from any region. Similarly, very little literature was available on *Epinephelus*  
410 *areolatus* for its life history parameters or other biological characteristics despite the high  
411 recorded abundance in the catch. These disparities highlight a data gap in the literature that  
412 hampers our understanding of this lucrative and ecologically important demersal fishery.

413 Nadon & Ault define  $L_{\max}$  as the 99th percentile of lengths in a population, apparently as  
414 a means to exclude "anomalous individuals" [22]. Whereas we agree with Nadon & Ault in their  
415 method to derive  $L_{\inf}$  from an estimate of  $L_{\max}$ , we note that the 99th percentile of lengths  
416 depends not only on the life-history parameters of the species, but also on its exploitation status  
417 and selectivity of the fishing gear. This somewhat impairs the use of the 99th percentile of  
418 lengths as an estimate of the size that a fish can attain. Applied to the 25 most common species in  
419 the fishery, the approach of Nadon & Ault would have resulted in an estimate of  $L_{\max}$  that is on  
420 average 13% lower than the largest fish we encountered (in the 25 most common species in the  
421 fishery). Upon closer inspection of the length-frequency distributions, we could not justify  
422 exclusion of the substantial range between the 99th percentile and the maximum of lengths as

423 anomalous. We therefore adopted a more straightforward process by simply adopting the length  
424 of the largest fish encountered as the estimate for the largest size a fish can attain, from which we  
425 then derived  $L_{inf}$ , accepting our estimate of  $L_{inf}$  only if it exceeded published values of  $L_{inf}$  for that  
426 species. In practice, for the 25 most common species, the  $L_{inf}$  estimates derived from our data all  
427 exceeded published  $L_{inf}$  values. We deemed 90% of  $L_{max}$  a reasonable estimate for  $L_{inf}$ ,  
428 acknowledging that 90% is somewhat of an arbitrary value [22].

429         During literature and photograph review, determining the data validity remained a  
430 challenge due to species identification issues [23]. *Aphareus rutilans* have frequently been traded  
431 as *Aphareus furca* in Indonesian fisheries (P. Mous personal observation). *A. furca* has a much  
432 smaller  $L_{max}$  and predominantly lives in shallower habitats. Only after better understanding the  
433 fishery (the fishing area, fishing depth, gear type, and distribution of the fish species) could we  
434 infer that what has been recorded as *A. furca* prior to this research was actually *A. rutilans*. Such  
435 misidentification of species obfuscates stakeholders from understanding the fishery. Description  
436 on the differences between *Etelis carbunculus* and *Etelis sp.* was fairly recent [11]. Prior to 2016,  
437 life history estimates between the two cryptic species may have originated from both species  
438 [11].

439         We assessed the original references for each value that is presented in FishBase during  
440 our literature search and assessment [50]. In the database, most references for  $L_{max}$  values were  
441 based on previous studies, identification guide, and angling trophy websites [50]. However, the  
442 referenced studies either did not fulfill our criteria or could not be found. Another issue was the  
443  $L_{max}$  verification from identification guides. For example, *L. malabaricus* and *P. filamentosus*  
444 had  $L_{max}$  values in identification guides that were larger than  $L_{x-CODRS}$  [51,52] However, due to  
445 the opacity of the number and lack of studies and/or trophy photographs to corroborate the



446 values, we had to reject these  $L_{\max}$  values from the identification guides. In addition, there were  
447 species misidentifications in the referenced angling database that were in turn referenced several  
448 times in FishBase. For example, a photograph of *P. filamentosus* was misidentified as *P.*  
449 *sieboldii*, leading to an abnormally large  $L_{\max}$  value in FishBase.

450

## 451 **Updating Other Life History Parameters**

452 Our method to calculate  $L_{\text{mat}}$  resulted in values that are within the range of published values,  
453 with a few exceptions (**Fig. 5**). When possible, we verified the validity of our updated  $L_{\text{mat}}$   
454 values with those derived from available maturity studies, both within and outside the latitudinal  
455 range where it was caught. A common trend of  $L_{\text{mat}}$  values in the literature is the lack of  
456 consistency of values across studies, thus creating large  $L_{\text{mat}}$  ranges. For example,  $L_{\text{mat}}$  studies of  
457 *P. filamentosus* from latitudes near the equator tended to estimate larger values than values  
458 published in studies conducted in higher latitudes [53–55]. However, the opposite trend occurred  
459 in  $L_{\text{mat}}$  values for *L. sebae*, *L. malabaricus*, and *L. erythropterus* [16,56–62].  $L_{\text{mat}}$  estimates from  
460 our methodology for *P. sieboldii*, *P. filamentosus*, *L. sebae*, *L. malabaricus*, *L. erythropterus*,  
461 and *Epinephelus areolatus* were somewhere in the middle of previously published ranges. Our  
462  $L_{\text{mat}}$  estimates of *P. multidentis* and *Etelis sp.* were lower than previous estimates in similar  
463 latitudes [51,56,63]. Finally, our  $L_{\text{mat}}$  estimates of *Lutjanus vitta* and *Lethrinus laticaudis* were  
464 larger than previous  $L_{\text{mat}}$  estimates. As one can see from these varied findings and comparisons  
465 across studies, there was no consistency on  $L_{\text{mat}}$  values that relate to latitudinal ranges from our  
466 study and the degree to which they agreed with other studies.

467

468 **Fig. 5. Length at maturity ( $L_{\text{mat}}$ ; cm) values for the top 15 species as well as *Etelis sp.* as**  
469 **calculated from our crew operated data recording system (CODRS) compared to those**

470 **from the literature that were either inside or outside the latitude range of where they were**  
471 **caught in this study.**  
472

473         The differences we show between previously published  $L_{\text{mat}}$  values for the same fish  
474 species highlight the need for local values, as the difference may be important for stock  
475 assessments. For example,  $L_{\text{mat}}$  for *P.multidens* had the largest range of values from the  
476 literature, with 35 cm being the lowest [64] and the highest as 61 cm [56]; ours was 50 cm. Mees  
477 [53] estimated  $L_{\text{mat}}$  for *P.filamentosus* in Seychelles (58 cm) with samples encompassing a wide  
478 size range and large sample size. But then Ralston and Miyamoto [54] estimated  $L_{\text{mat}}$  of 44 cm  
479 from a very limited sample size. None of the previous research can represent the  $L_{\text{mat}}$  of  
480 *P.filamentosus* in Indonesian waters, however, as our estimate is in between the values proposed  
481 by the two studies.  $L_{\text{mat}}$  values for *L.laticaudis* were 22 cm (female) and 18 cm (male) [65].  
482 These values were lower than our  $L_{\text{mat}}$  estimate, however, they originated from Shark Bay,  
483 Western Australia, which is outside the latitudinal range of our catches. The lack of previous  
484 maturity research on these species leads to high uncertainties in estimating plausible ranges for  
485  $L_{\text{mat}}$ .

486         Similar to other life history values and studies from species-rich fisheries, species  
487 identification remains an issue. Coupled with the difficulty of acquiring samples for gonad  
488 maturity studies that is representative of the population, it is not surprising that the results of  
489 previous research were highly variable. Despite their prevalence in the catches, *P. typus*, *A.*  
490 *rutilans*, *P. lewisi*, and *Paracaesio kusakarii* did not have any maturity studies in the literature.  
491 Cross referencing values with other maturity studies were deemed important to illustrate the  
492 range of  $L_{\text{mat}}$  from pre-existing estimates and how our updated estimates compare.

493

## 494 **Implications for Management**

495 Fishery-dependent data may uncover new trends in the biology of the catch that is  
496 relevant for management. In this case, the large amount of length data from CODRS helped  
497 determine new  $L_{\max}$  parameters. Especially in exploited fisheries where large fish are rare, a  
498 small sample size will result in inaccurate information on the status of the stock. Life history  
499 parameter values are an integral part of length-based stock assessments. Incorrect life history  
500 parameters can lead to underestimation or overestimation of percentages of catches in each  
501 category and the status of the stock. The three indicators of overfishing (percentage of mature  
502 fish in the catch, percentage of optimum length, and percentage of mega-spawners) and other  
503 length-based stock assessment methods, such as reference points based on spawning potential  
504 ratio (SPR) and/or numerical population model rely on precise estimates of the  $L_{\text{mat}}$ ,  $L_{\text{opt}}$ , and  $L_{\text{inf}}$   
505 [12,13,66]. With proper interpretations, results from these assessments can inform fishery  
506 managers on the sustainability of the species in the fishery [25].

507 The consequence of erroneous life history parameters depends on the magnitude of the  
508 value discrepancy. Large value discrepancies may skew outcomes of stock assessments. For  
509 example, *P. typus*'s  $L_{\max}$  from the FAO species catalogue was 70 cm; we estimated 85 cm.  
510 Based on our estimates, the  $L_{\text{mat}}$  should be 8 cm larger. Based on the length-frequency  
511 distribution of *P. typus* in the catch to date, we would have underestimated the percentage of  
512 immature fish by 444%, overestimated percentage of optimum length by 14%, and overestimated  
513 the percentage of mega-spawners by 74%. As a consequence, we would have concluded that the  
514 *P. typus* stock is in good condition – low levels of immature fish and high levels of optimum  
515 length fish in the catch. With the updated values, however, we observe a vastly different picture  
516 from the catch where 41% of the catch is immature. These results coupled with other assessment

517 techniques will indicate the stock is being overfished. This simple example shows the importance  
518 to strive for the most accurate parameter values available that minimize biases and other stock  
519 assessment uncertainties for management.

520 To understand the characteristics of the catch in this fishery, examining the catch at a  
521 species level is important. However, current practices do not reflect this need – both government  
522 and private sector clump different species into arbitrary groups under a trade name or a common  
523 name in their respective databases. For example, *Lutjanus erythropterus*, *Pinajo pinjalo*, and  
524 *Pinjalo lewisi* are frequently grouped together as “red snapper” [49]. This grouping, without  
525 biological or ecological basis, can lead to underestimation of  $L_{mat}$  values of slower growing  
526 species. However, the  $L_{mat}$  between the largest and smallest species differs by up to 12 cm.  
527 Managing these species as one group would lead to overfishing of the largest growing species (*P.*  
528 *pinjalo*) and under-fishing of the smallest species (*P. lewisi*). Another example, *Paracaesio*  
529 *kusakarii* and *Paracaesio stonei* – differentiated morphologically only by the presence or  
530 absence of scales on the maxilla – differs 7 cm in its  $L_{mat}$ . Currently they are recorded and traded  
531 under the same name, which results in growth overfishing of *P. stonei*.

532

## 533 **Conclusions**

534 In Indonesia, a multi-species data collection program of this scale has never been  
535 documented before. Our crew operated data recording system (CODRS) as a method proved to  
536 be an accurate and effective system to gather catch and effort data for the deep-slope demersal  
537 fishery in Indonesia. In addition to collecting high-volume data, CODRS may also act as a first  
538 step to collaborative fishery management by engaging fishers in data collection and providing  
539 constant feedback between researcher and fisher. The quantity of verifiable length measurements

540 enabled us to compare catch composition between gear types and update important life-history  
541 parameters such as maximum length ( $L_{max}$ ) and others which will be important for length-based  
542 stock assessments. We hope that the ability of CODRS to gather the high amount of species-  
543 specific catch and effort data in this pilot study can empower other fishery scientists and  
544 managers to replicate and improve this system in other data-poor multi-species fisheries.

545

## 546 **Acknowledgements**

547 We would like to thank program manager (Laksmi Larasiti); all staff and field  
548 coordinators (Wawan Gede, Wahyu Dita, Geertruidha Latumeten, Helmy Wurlianty, Jersey  
549 Cumentas, Seran Abe, Nenden Siti Noviyanti, Syalomitha Hukom, Meysella Anugrah, Petronela  
550 Padja, Fatich Ubaidillah, Musa Adi, Josep Lumingas, Nandana Gozali, Dieri Tarau, Hastuti  
551 Sabang) at The Nature Conservancy Indonesia Fisheries Conservation Program for their help in  
552 data collection. We would also like to thank Dr. Jos Pet for his guidance in design and  
553 implementation of the CODRS program, and for his valuable comments on an early version of  
554 the manuscript.

555

## 556 **References**

- 557 1. Chen Y, Chen L, Stergiou KI. Impacts of data quantity on fisheries stock assessment.  
558 *Aquat Sci.* 2003;65(1):92–8.
- 559 2. Bradley D, Merrifield M, Miller KM, Lomonico S, Wilson JR, Gleason MG.  
560 Opportunities to improve fisheries management through innovative technology and  
561 advanced data systems. *Fish Fish.* 2019;

- 562 3. Witt MJ, Godley BJ. A step towards seascape scale conservation: Using vessel monitoring  
563 systems (VMS) to map fishing activity. *PLoS One*. 2007;2(10).
- 564 4. Sondita MFA, Andamari R. A review of Indonesia's Indian Ocean: Tuna Fisheries.  
565 ACIAR Project FIS/2001/079. 2003.
- 566 5. Yuniarta S, van Zwieten PAM, Groeneveld RA, Wisudo SH, van Ierland EC. Uncertainty  
567 in catch and effort data of small- and medium-scale tuna fisheries in Indonesia: Sources,  
568 operational causes and magnitude. *Fish Res*. 2017;193:173–83.
- 569 6. Mangi SC, Dolder PJ, Catchpole TL, Rodmell D, de Rozarieux N. Approaches to fully  
570 documented fisheries: Practical issues and stakeholder perceptions. *Fish Fish*.  
571 2015;16(3):426–52.
- 572 7. Cawthorn DM, Mariani S. Global trade statistics lack granularity to inform traceability  
573 and management of diverse and high-value fishes. *Sci Rep*. 2017;7(1).
- 574 8. Ridho MR, Kaswadji RF, Jaya I, Nurhakim S. Distribusi Sumberdaya Ikan Demersal Di  
575 Perairan Laut Cina Selatan. *J ilmu-ilmu Perair dan Perikan Indones*. 2001;11(2):123–8.
- 576 9. Bianchi G, Badrudin M, Budihardjo S. Demersal assemblages of the Java Sea: a study  
577 based on the trawl surveys of the R/V Mutiara. In: Pauly D, Martosubroto P, editors.  
578 Baseline studies of biodiversity: the fish resources of Western Indonesia. *ICLARM Stud.*;  
579 1996. p. 55–61.
- 580 10. Anggraeni Y. Identifikasi Dan Prevalensi Cacing Pada Saluran Pencernaan Ikan Kakap  
581 Merah (*Lutjanus sanguineus*) Di Pelabuhan Perikanan Nusantara Brondong Lamongan  
582 Jawa Timur. Skripsi. Universitas Airlangga; 2014.
- 583 11. Andrews KR, Williams AJ, Fernandez-Silva I, Newman SJ, Copus JM, Wakefield CB, et  
584 al. Phylogeny of deepwater snappers (Genus *Etelis*) reveals a cryptic species pair in the

- 585 Indo-Pacific and Pleistocene invasion of the Atlantic. *Mol Phylogenet Evol.*  
586 2016;100:361–71.
- 587 12. Froese R. Keep it simple: Three indicators to deal with overfishing. Vol. 5, *Fish and*  
588 *Fisheries*. 2004. p. 86–91.
- 589 13. Froese R, Binohlan C. Empirical relationships to estimate asymptotic length, length at first  
590 maturity and length at maximum yield per recruit in fishes, with a simple method to  
591 evaluate length frequency data. *J Fish Biol.* 2000;56(4):758–73.
- 592 14. Hordyk A, Ono K, Valencia S, Loneragan N, Prince J. A novel length-based empirical  
593 estimation method of spawning potential ratio (SPR), and tests of its performance, for  
594 small-scale, data-poor fisheries. In: *ICES Journal of Marine Science*. 2014. p. 217–31.
- 595 15. Prince J, Victor S, Kloulchad V, Hordyk A. Length based SPR assessment of eleven Indo-  
596 Pacific coral reef fish populations in Palau. *Fish Res.* 2015;171:42–58.
- 597 16. Newman SJ, Dunk IJ. Growth, age validation, mortality, and other population  
598 characteristics of the red emperor snapper, *Lutjanus sebae* (Cuvier, 1828), off the  
599 Kimberley coast of north-western Australia. *Estuar Coast Shelf Sci.* 2002;55(1):67–80.
- 600 17. MacCall AD. Quantitative Fish Dynamics. Vol. 96, *Journal of the American Statistical*  
601 *Association*. New York: Oxford University Press; 2009. 781–781 p.
- 602 18. Thorson JT, Simpfendorfer CA. Gear selectivity and sample size effects on growth curve  
603 selection in shark age and growth studies. *Fish Res.* 2009;98(1–3):75–84.
- 604 19. Hirschhorn K. The effects of different age ranges on estimated Bertalanffy growth  
605 parameters in three fishes and one mollusk of the northeastern Pacific Ocean. In: Bagenal  
606 T, editor. *The ageing of fish*. England: Unwin Bros; 1974. p. 192–9.
- 607 20. Taylor NG, Walters CJ, Martell SJD. Corrigendum: A new likelihood for simultaneously

- 608           estimating von Bertalanffy growth parameters, gear selectivity, and natural and fishing  
609           mortality. *Can J Fish Aquat Sci.* 2011;68(8):1507–1507.
- 610   21.   Walsh WA, Ito RY, Kawamoto KE, McCracken M. Analysis of logbook accuracy for blue  
611           marlin (*Makaira nigricans*) in the Hawaii-based longline fishery with a generalized  
612           additive model and commercial sales data. *Fish Res.* 2005;75(1–3):175–92.
- 613   22.   Nadon MO, Ault JS. A stepwise stochastic simulation approach to estimate life history  
614           parameters for data-poor fisheries. *Can J Fish Aquat Sci.* 2016;73(12):1874–84.
- 615   23.   Newman SJ, Williams AJ, Wakefield CB, Nicol SJ, Taylor BM, O’Malley JM. Review of  
616           the life history characteristics, ecology and fisheries for deep-water tropical demersal fish  
617           in the Indo-Pacific region. Vol. 26, *Reviews in Fish Biology and Fisheries.* 2016. p. 537–  
618           62.
- 619   24.   Martinez-Andrade F. A Comparison of Life Histories and Ecological Aspects among  
620           Snappers (Pisces:Lutjanidae). Ph.D. Thesis. Louisiana State University, USA. Louisiana  
621           State University; 2003.
- 622   25.   Cope JM, Punt AE. Length-Based Reference Points for Data-Limited Situations:  
623           Applications and Restrictions. *Mar Coast Fish.* 2009;1(1):169–86.
- 624   26.   Brown-Peterson NJ, Wyanski DM, Saborido-Rey F, Macewicz BJ, Lowerre-Barbieri SK.  
625           A standardized terminology for describing reproductive development in fishes. *Mar Coast*  
626           *Fish.* 2011;3(1):52–70.
- 627   27.   Maunder MN, Punt AE. Standardizing catch and effort data: A review of recent  
628           approaches. *Fish Res.* 2004;70(2-3 SPEC. ISS.):141–59.
- 629   28.   Gomez C, Williams AJ, Nicol SJ, Mellin C, Loeun KL, Bradshaw CJA. Species  
630           distribution models of tropical deep-sea snappers. *PLoS One.* 2015;10(6).



- 631 29. Morris L, Ball D. Habitat suitability modelling of economically important fish species  
632 with commercial fisheries data. *ICES J Mar Sci.* 2006;63(9):1590–603.
- 633 30. Pelletier D, Ferraris J. A multivariate approach for defining fishing tactics from  
634 commercial catch and effort data. *Can J Fish Aquat Sci.* 2011;57(1):51–65.
- 635 31. Russo T, Parisi A, Cataudella S. New insights in interpolating fishing tracks from VMS  
636 data for different métiers. *Fish Res.* 2011;108(1):184–94.
- 637 32. Ticheler HJ, Kolding J, Chanda B. Participation of local fishermen in scientific fisheries  
638 data collection: A case study from the Bangweulu Swamps, Zambia. *Fish Manag Ecol.*  
639 1998;5(1):81–92.
- 640 33. Prescott J, Riwu J, Stacey N, Prasetyo A. An unlikely partnership: fishers’ participation in  
641 a small-scale fishery data collection program in the Timor Sea. *Rev Fish Biol Fish.*  
642 2016;26(4):679–92.
- 643 34. Nielsen JR, Degnbol P, Viswanathan KK, Ahmed M, Hara M, Abdullah NMR. Fisheries  
644 co-management-an institutional innovation? Lessons from South East Asia and Southern  
645 Africa. *Mar Policy.* 2004;28(2):151–60.
- 646 35. Berkes F. Evolution of co-management: Role of knowledge generation, bridging  
647 organizations and social learning. Vol. 90, *Journal of Environmental Management.* 2009.  
648 p. 1692–702.
- 649 36. Bell RJ, Gervelis B, Chamberlain G, Hoey J. Discard estimates from self-reported catch  
650 data: An example from the U.S. northeast shelf. *North Am J Fish Manag.*  
651 2017;37(5):1130–44.
- 652 37. Gutiérrez NL, Hilborn R, Defeo O. Leadership, social capital and incentives promote  
653 successful fisheries. *Nature.* 2011;470(7334):386–9.

- 654 38. White DJ, Svellingen C, Strachan NJC. Automated measurement of species and length of  
655 fish by computer vision. *Fish Res.* 2006;80(2–3):203–10.
- 656 39. Moffitt RB, Parrish F a. Habitat and life history of juvenile Hawaiian pink snapper,  
657 *Pristipomoides filamentosus*. *Pacific Sci.* 1996;50(4):371–81.
- 658 40. Williams AJ, Loewen K, Nicol SJ, Chavance P, Ducrocq M, Harley SJ, et al. Population  
659 biology and vulnerability to fishing of deep-water Eteline snappers. *J Appl Ichthyol.*  
660 2013;29(2):395–403.
- 661 41. Williams AJ, Wakefield CB, Newman SJ, Vourey E, Abascal FJ, Halafih T, et al.  
662 Oceanic, Latitudinal, and Sex-Specific Variation in Demography of a Tropical Deepwater  
663 Snapper across the Indo-Pacific Region. *Front Mar Sci.* 2017;4.
- 664 42. Ovenden JR, Salini J, O’Connor S, Street R. Pronounced genetic population structure in a  
665 potentially vagile fish species (*Pristipomoides multidens*, Teleostei; Perciformes;  
666 Lutjanidae) from the East Indies triangle. *Mol Ecol.* 2004;13(7):1991–9.
- 667 43. Misa WFXE, Drazen JC, Kelley CD, Moriwake VN. Establishing species-habitat  
668 associations for 4 eteline snappers with the use of a baited stereo-video camera system.  
669 *Fish Bull.* 2013;111(4):293–308.
- 670 44. Oyafuso ZS, Drazen JC, Moore CH, Franklin EC. Habitat-based species distribution  
671 modelling of the Hawaiian deepwater snapper-grouper complex. *Fish Res.* 2017;195:19–  
672 27.
- 673 45. Newman SJ, Dunk IJ. Age validation, growth, mortality, and additional population  
674 parameters of the goldband snapper (*Pristipomoides multidens*) off the Kimberley coast of  
675 northwestern Australia. *Fish Bull.* 2003;101(1):116–28.
- 676 46. Ralston S V, Williams HA. Depth distributions, growth and mortality of deep slope fishes

- 677 from the Mariana Archipelago. Vol. NOAA-TM-NM, NOAA Technical Memorandum  
678 NMFS. Honolulu; 1988.
- 679 47. Lokani P, Pitiale H, Richards A, Tiroba G. Estimation of the unexploited biomass and  
680 maximum sustainable yield for the deep reef demersal fishes in Papua New Guinea. In:  
681 Polovina JJ, Shomura RS, editors. United States Agency for International Development  
682 and National Marine Fisheries Service Workshop on Tropical Fish Stock Assessment, 5-  
683 26 July 1989, Honolulu, Hawaii. 1990. p. 144.
- 684 48. Kikkawa BS. Maturation, spawning, and fecundity of opakapaka, *pristipomoides*  
685 *filamentosus*, in the northwestern hawaiian islands. Proc Res Inv NWHI UNIHI-  
686 SEAGRANT-MR-84-01. 1984;149–60.
- 687 49. Mous PJ, Gede W, Pet JS. Length Based Stock Assessment Of A Species Complex In  
688 Deepwater Demersal Bottom Long Line Fisheries Targeting Snappers In Indonesian  
689 Waters. Denpasar; 2018.
- 690 50. Froese R, Pauly D. FishBase [Internet]. 2012 [cited 2018 Nov 8]. Available from:  
691 <http://www.fishbase.org>
- 692 51. Allen GR. FAO species catalogue. Vol 6. Snappers of the world. An annotated and  
693 illustrated catalogue of lutjanid species known to date. Rome: FAO; 1985. 208 p.
- 694 52. Anderson WDJ. Lutjanidae. In: Smith MM, Heemstra PC, editors. Smiths' Sea Fishes.  
695 Berlin: Springer-Verlag; 1986. p. 572–9.
- 696 53. Mees CC. Population biology and stock assessment of *Pristipomoides filamentosus* on the  
697 Mahe Plateau, Seychelles. J Fish Biol. 1993;43(5):695–708.
- 698 54. Ralston S, Miyamoto GT. ANALYZING THE WIDTH OF DAILY OTOLITH  
699 INCREMENTS TO AGE THE HAWAIIAN SNAPPER , *PRISTIPOMOIDES*

- 700 FILAMENTOSUS Preparation of Otoliths Otolith Growth Rate and Specimen Age. Fish  
701 Bull. 1980;81(3):523–35.
- 702 55. Uehara M, Ebisawa A, Ohta I. Reproductive traits of deep-sea snappers (Lutjanidae):  
703 Implication for Okinawan bottomfish fisheries management. Reg Stud Mar Sci.  
704 2018;17:112–26.
- 705 56. Newman SJ, Moran MJ, Lenanton RCJ. Stock assessment of the outer-shelf species in the  
706 Kimberly region of tropical Western Australia. Final report to the Fisheries Research and  
707 Development Corporation (FRDC) in Project No. 97/136. 2001.
- 708 57. McPherson GR, Squire L, O'Brien J. Reproduction of Three Dominant Lutjanus Species  
709 of the Great Barrier Reef Inter-Reef Fishery. Asian Fish Sci. 1992;5:15–24.
- 710 58. Stephenson P, Mant J. Adaptive Management of The Pilbara Trawl Fishery. 1993. 72 p.
- 711 59. Fry GC, Milton DA. Age, growth and mortality estimates for populations of red snappers  
712 lutjanus erythropterus and l. malabaricus from northern australia and eastern Indonesia.  
713 Fish Sci. 2009;75(5):1219–29.
- 714 60. Wahyuningsih P, Ernawati T. Population Parameters of Red Snapper (Lutjanus  
715 malabaricus) in Eastern Java Sea. BAWAL. 2013;5(3):175–9.
- 716 61. Tirtadanu, Wagiyo K, Sadhotomo B. Growth, yield per recruit and spawning potential  
717 ratio of red snapper (Lutjanus malabaricus Schneider, 1801) in Sinjai and adjacent waters.  
718 J Penelit Perikan Indones. 2018;24(1):1–10.
- 719 62. Lau PPF, Li LWH. Identification Guide to Fishes in the Live Seafood Trade of the Asia-  
720 Pacific Region. Hong Kong; 2000. 137 p.
- 721 63. Lloyd JA. Demography of *Pristipomoides multidens* in northern Australia and a  
722 comparison within the Family Lutjanidae with respect to depth [Internet]. James Cook

- 723 University; 2006. Available from: <http://researchonline.jcu.edu.au/31598/>
- 724 64. Min TS, Senta T, Supongpan S. Fisheries biology of *Pristipomoides* (Family Lutjanidae)  
725 in the South China Sea and its adjacent waters. *Singapore J Prim Ind.* 1977;5(2):96–115.
- 726 65. Ayvazian S, Chatfield B, Keay I. The age, growth, reproductive biology and stock  
727 assessment of grass emperor, *Lethrinus laticaudis* in Shark Bay, Western Australia. North  
728 Beach: Department of Fisheries Research Division, Western Australia Marine Research  
729 Laboratories; 2004. 80 p.
- 730 66. Ault, JS; Bohnsack, J.A.; Meester GA. A retrospective (1979-96) multispecies assessment  
731 of fish stocks in the florida keys. *Fish Bull.* 1996;

732

## 733 **Supporting information**

734 **S1 Table. The length-weight relationship (a and b value) and conversion factor from fork**  
735 **length (FL) or standard length (SL) to total length (TL) for the top species in the deep-slope**  
736 **snapper-grouper fishery.**

737

738 **S2 Table. The top 100 species in the deep-slope snapper-grouper fishery by total count and**  
739 **by total weight.**

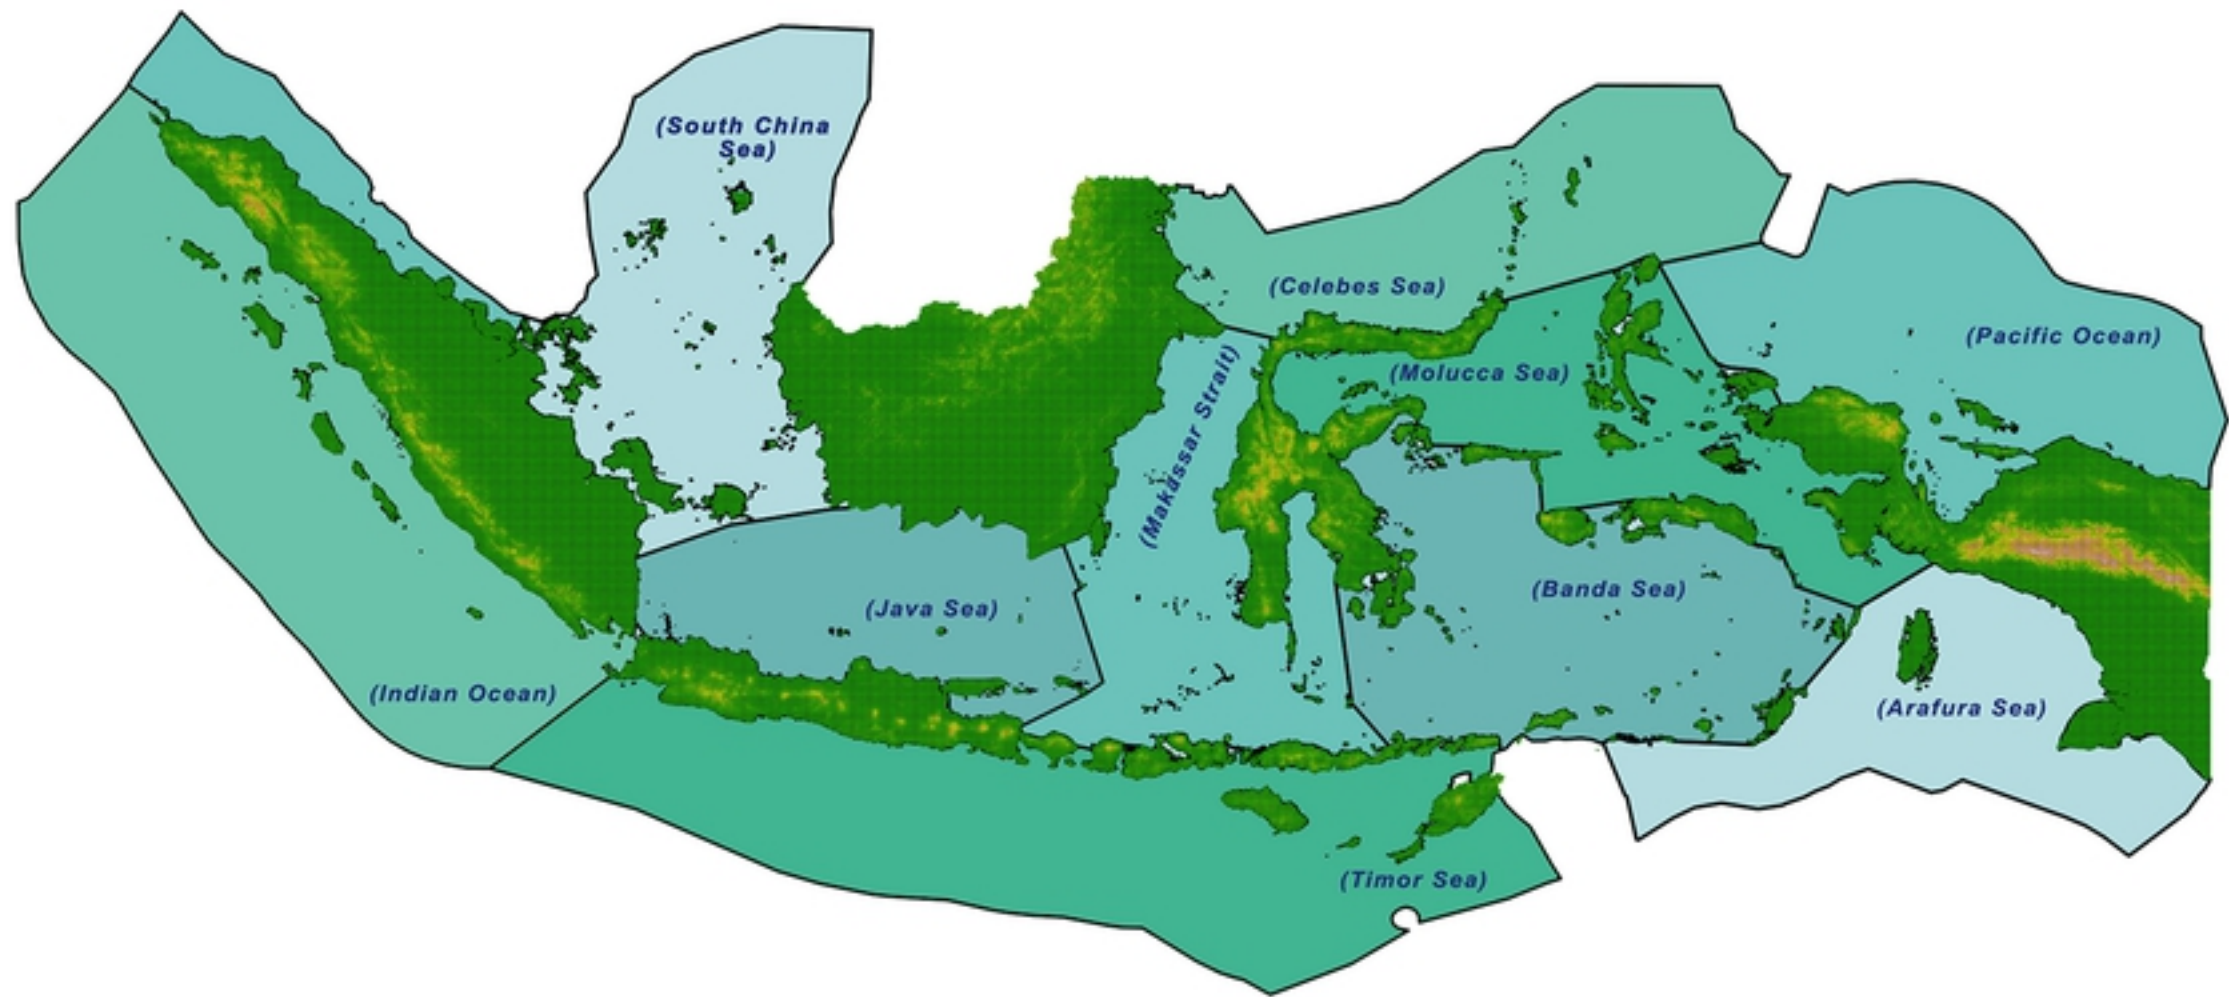

Figure 1

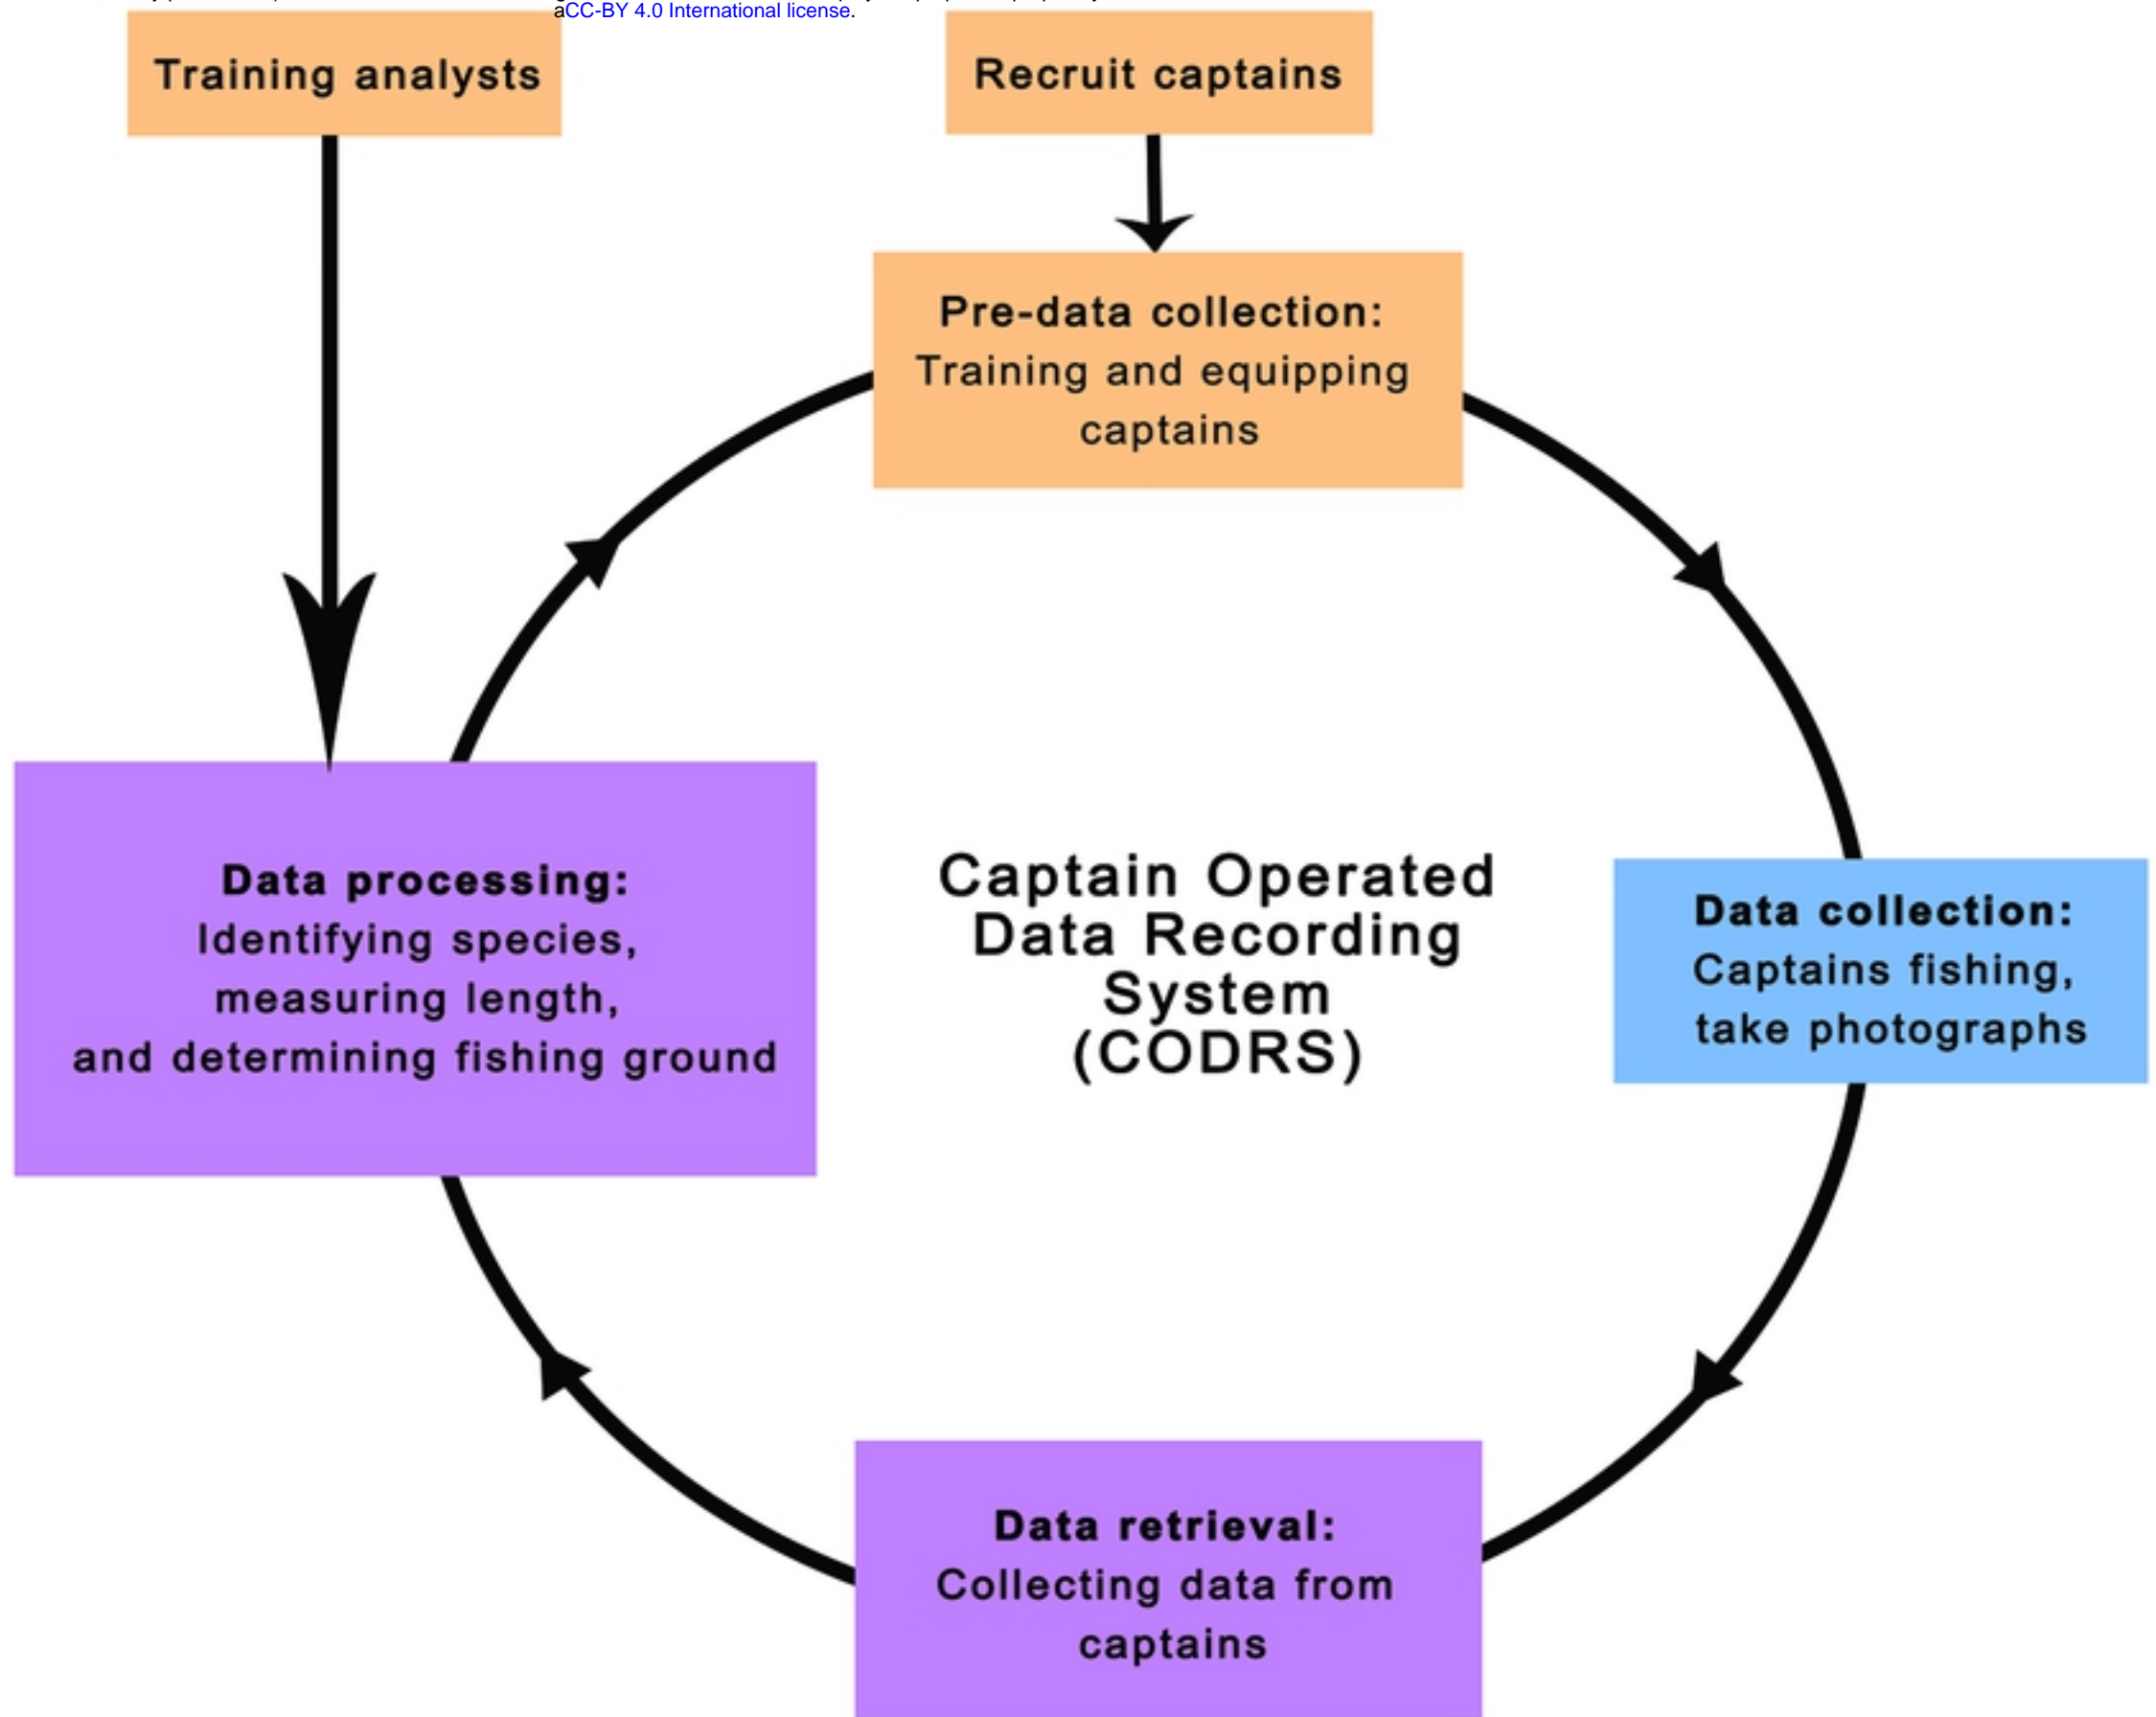

Figure 2

Total Weight (CODRS Data) (kg)

bioRxiv preprint doi: <https://doi.org/10.1101/655571>; this version posted May 30, 2019. The copyright holder for this preprint (which was not certified by peer review) is the author/funder, who has granted bioRxiv a license to display the preprint in perpetuity. It is made available under aCC-BY 4.0 International license.

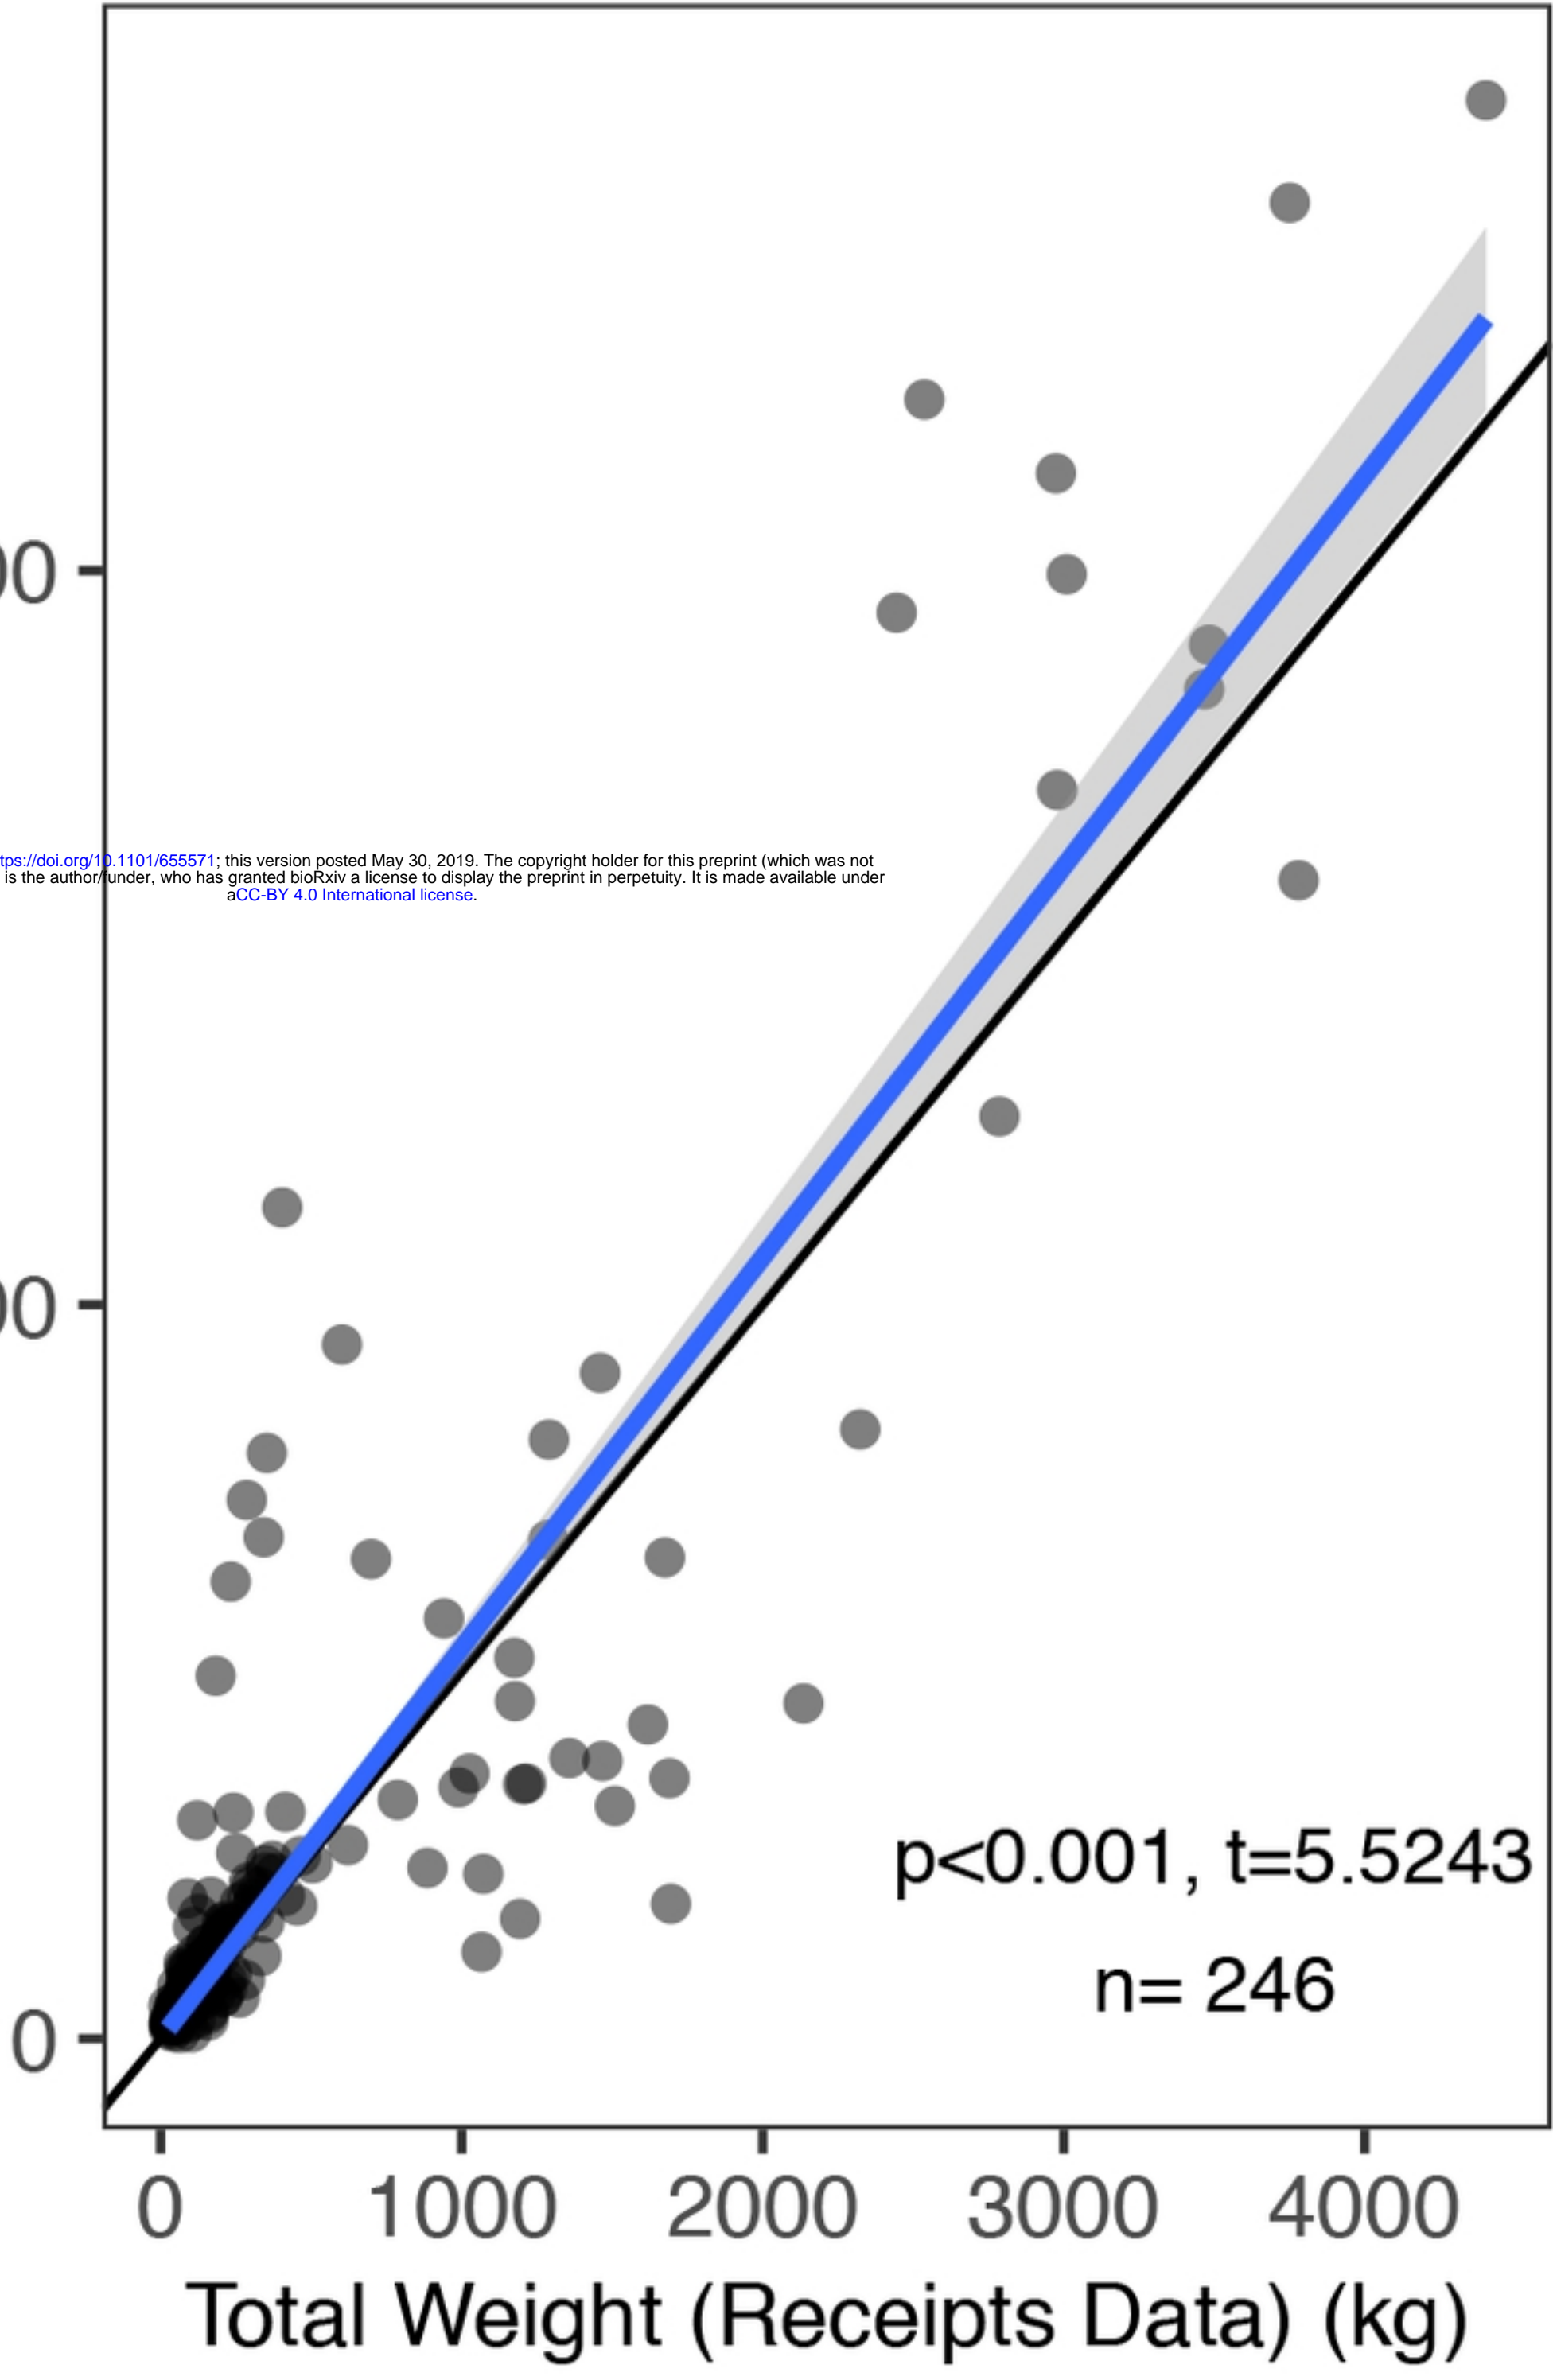

Figure 3



*Lutjanus malabaricus*

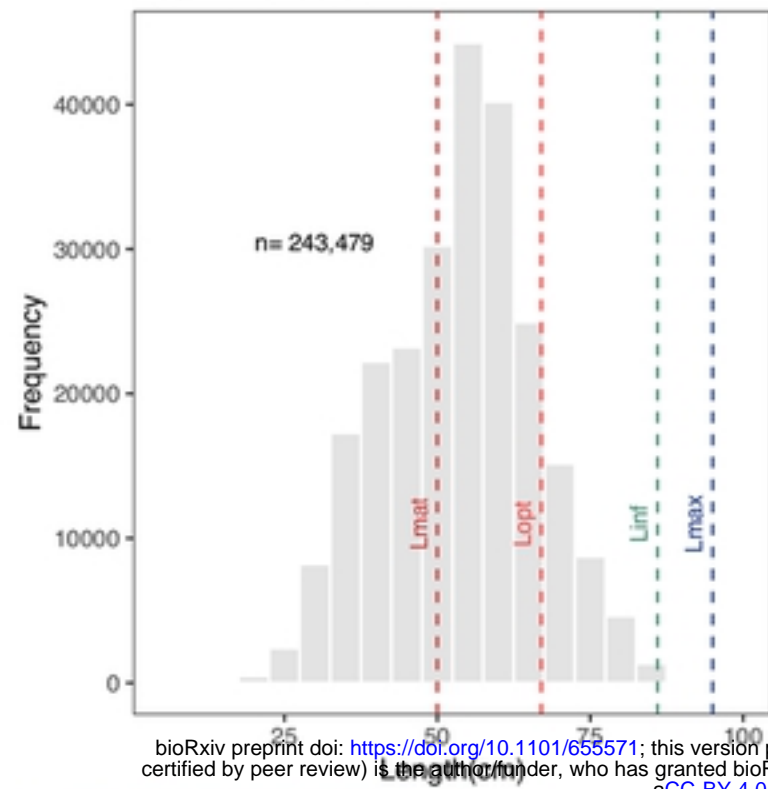

*Pristipomoides multidens*

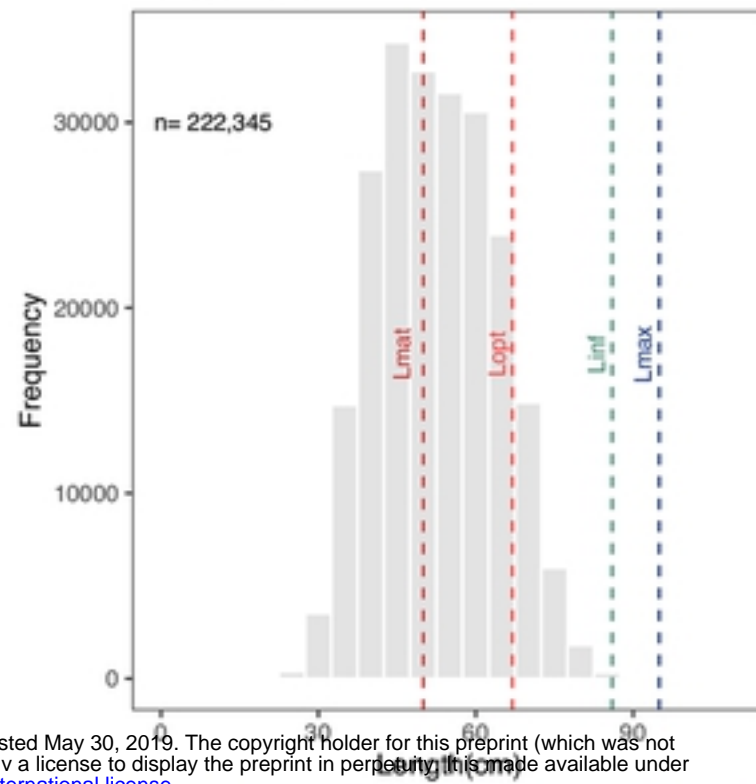

*Pristipomoides typus*

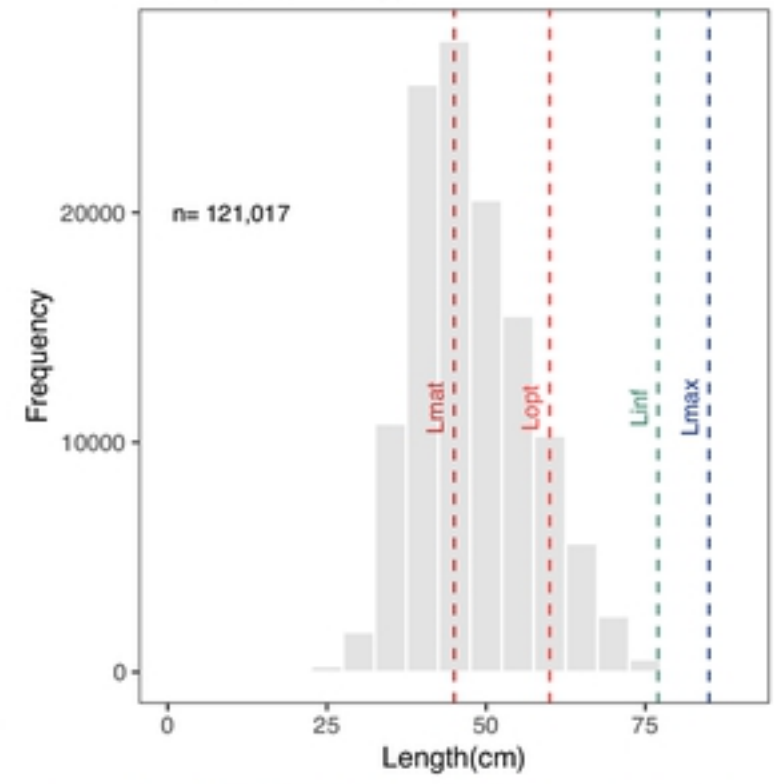

bioRxiv preprint doi: <https://doi.org/10.1101/655571>; this version posted May 30, 2019. The copyright holder for this preprint (which was not certified by peer review) is the author/funder, who has granted bioRxiv a license to display the preprint in perpetuity. It is made available under aCC-BY 4.0 International license.

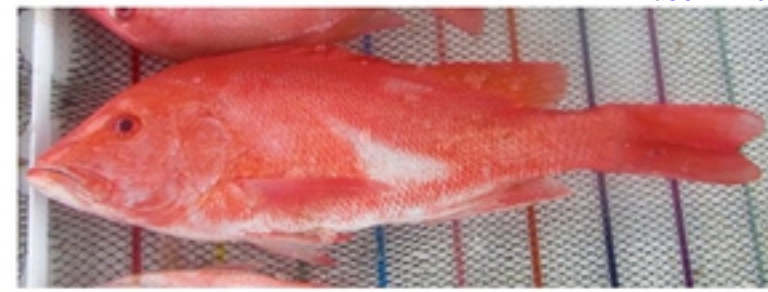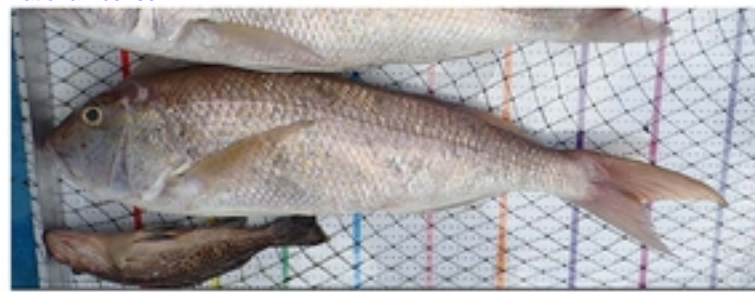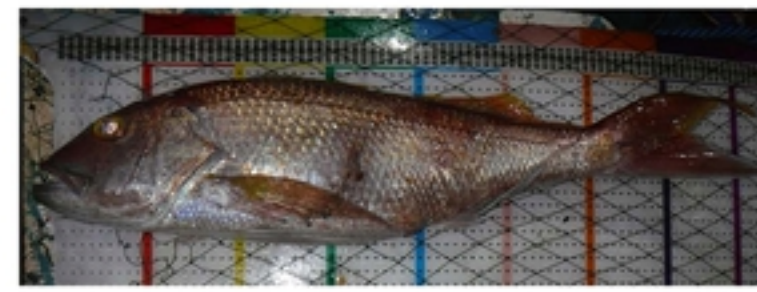

*Epinephelus areolatus*

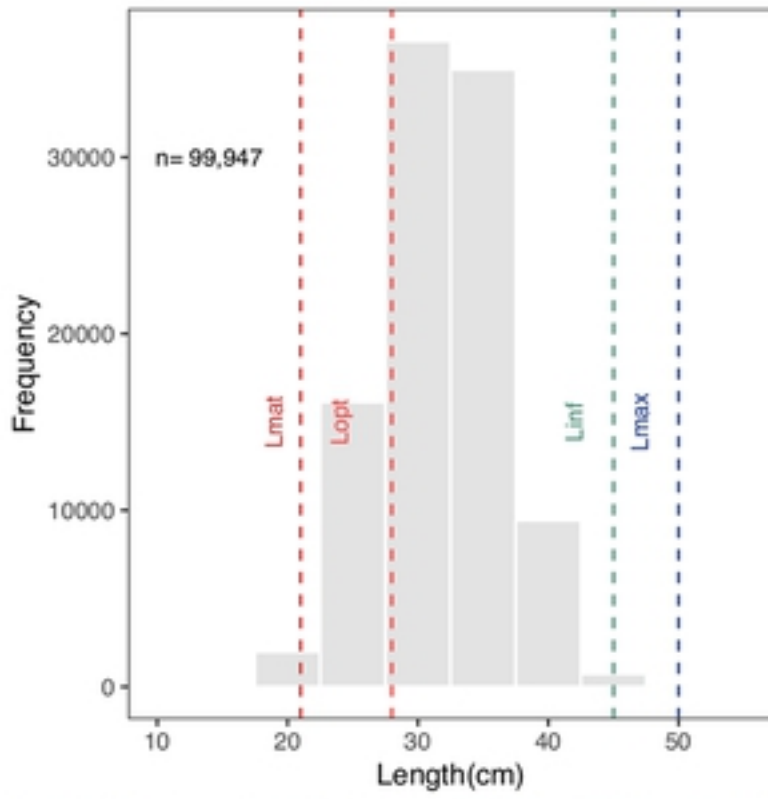

*Lutjanus erythropterus*

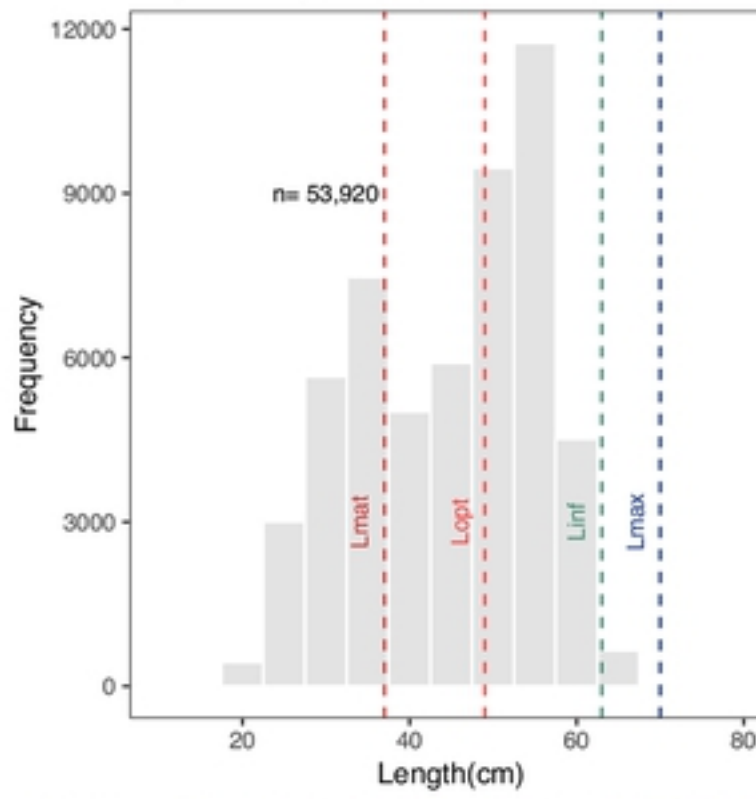

*Atrubucca brevis*

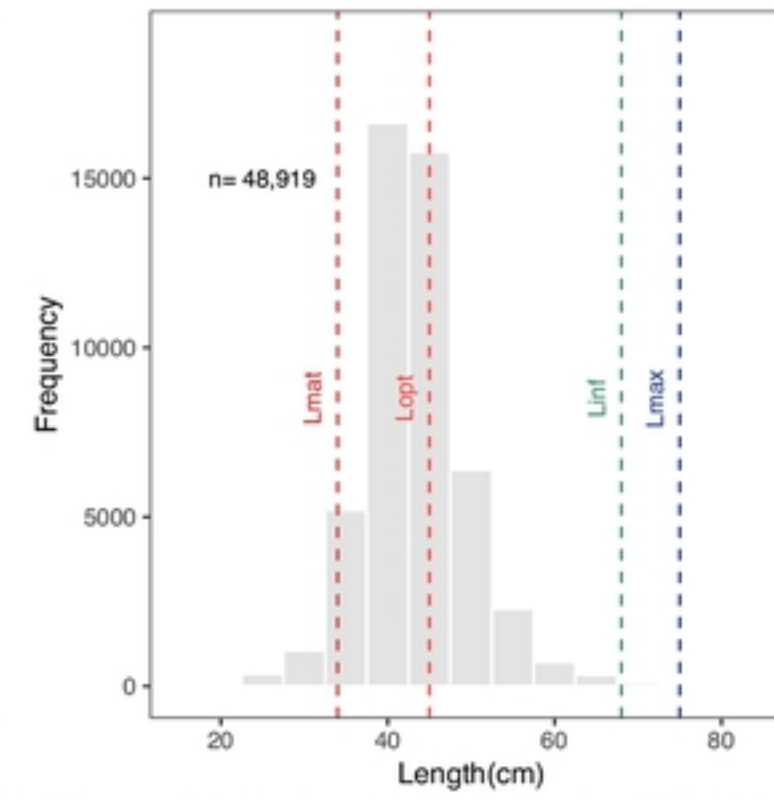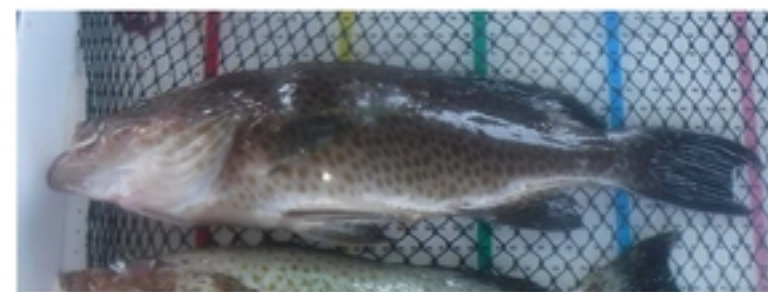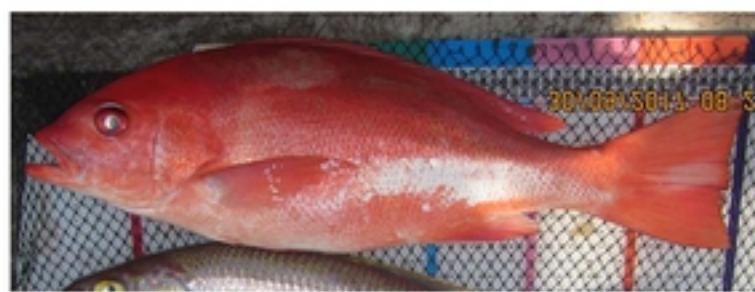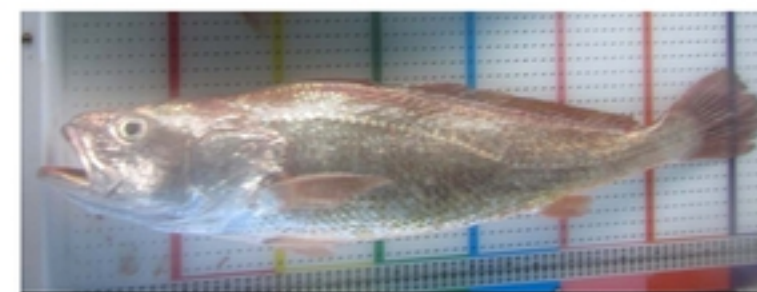

Figure 4

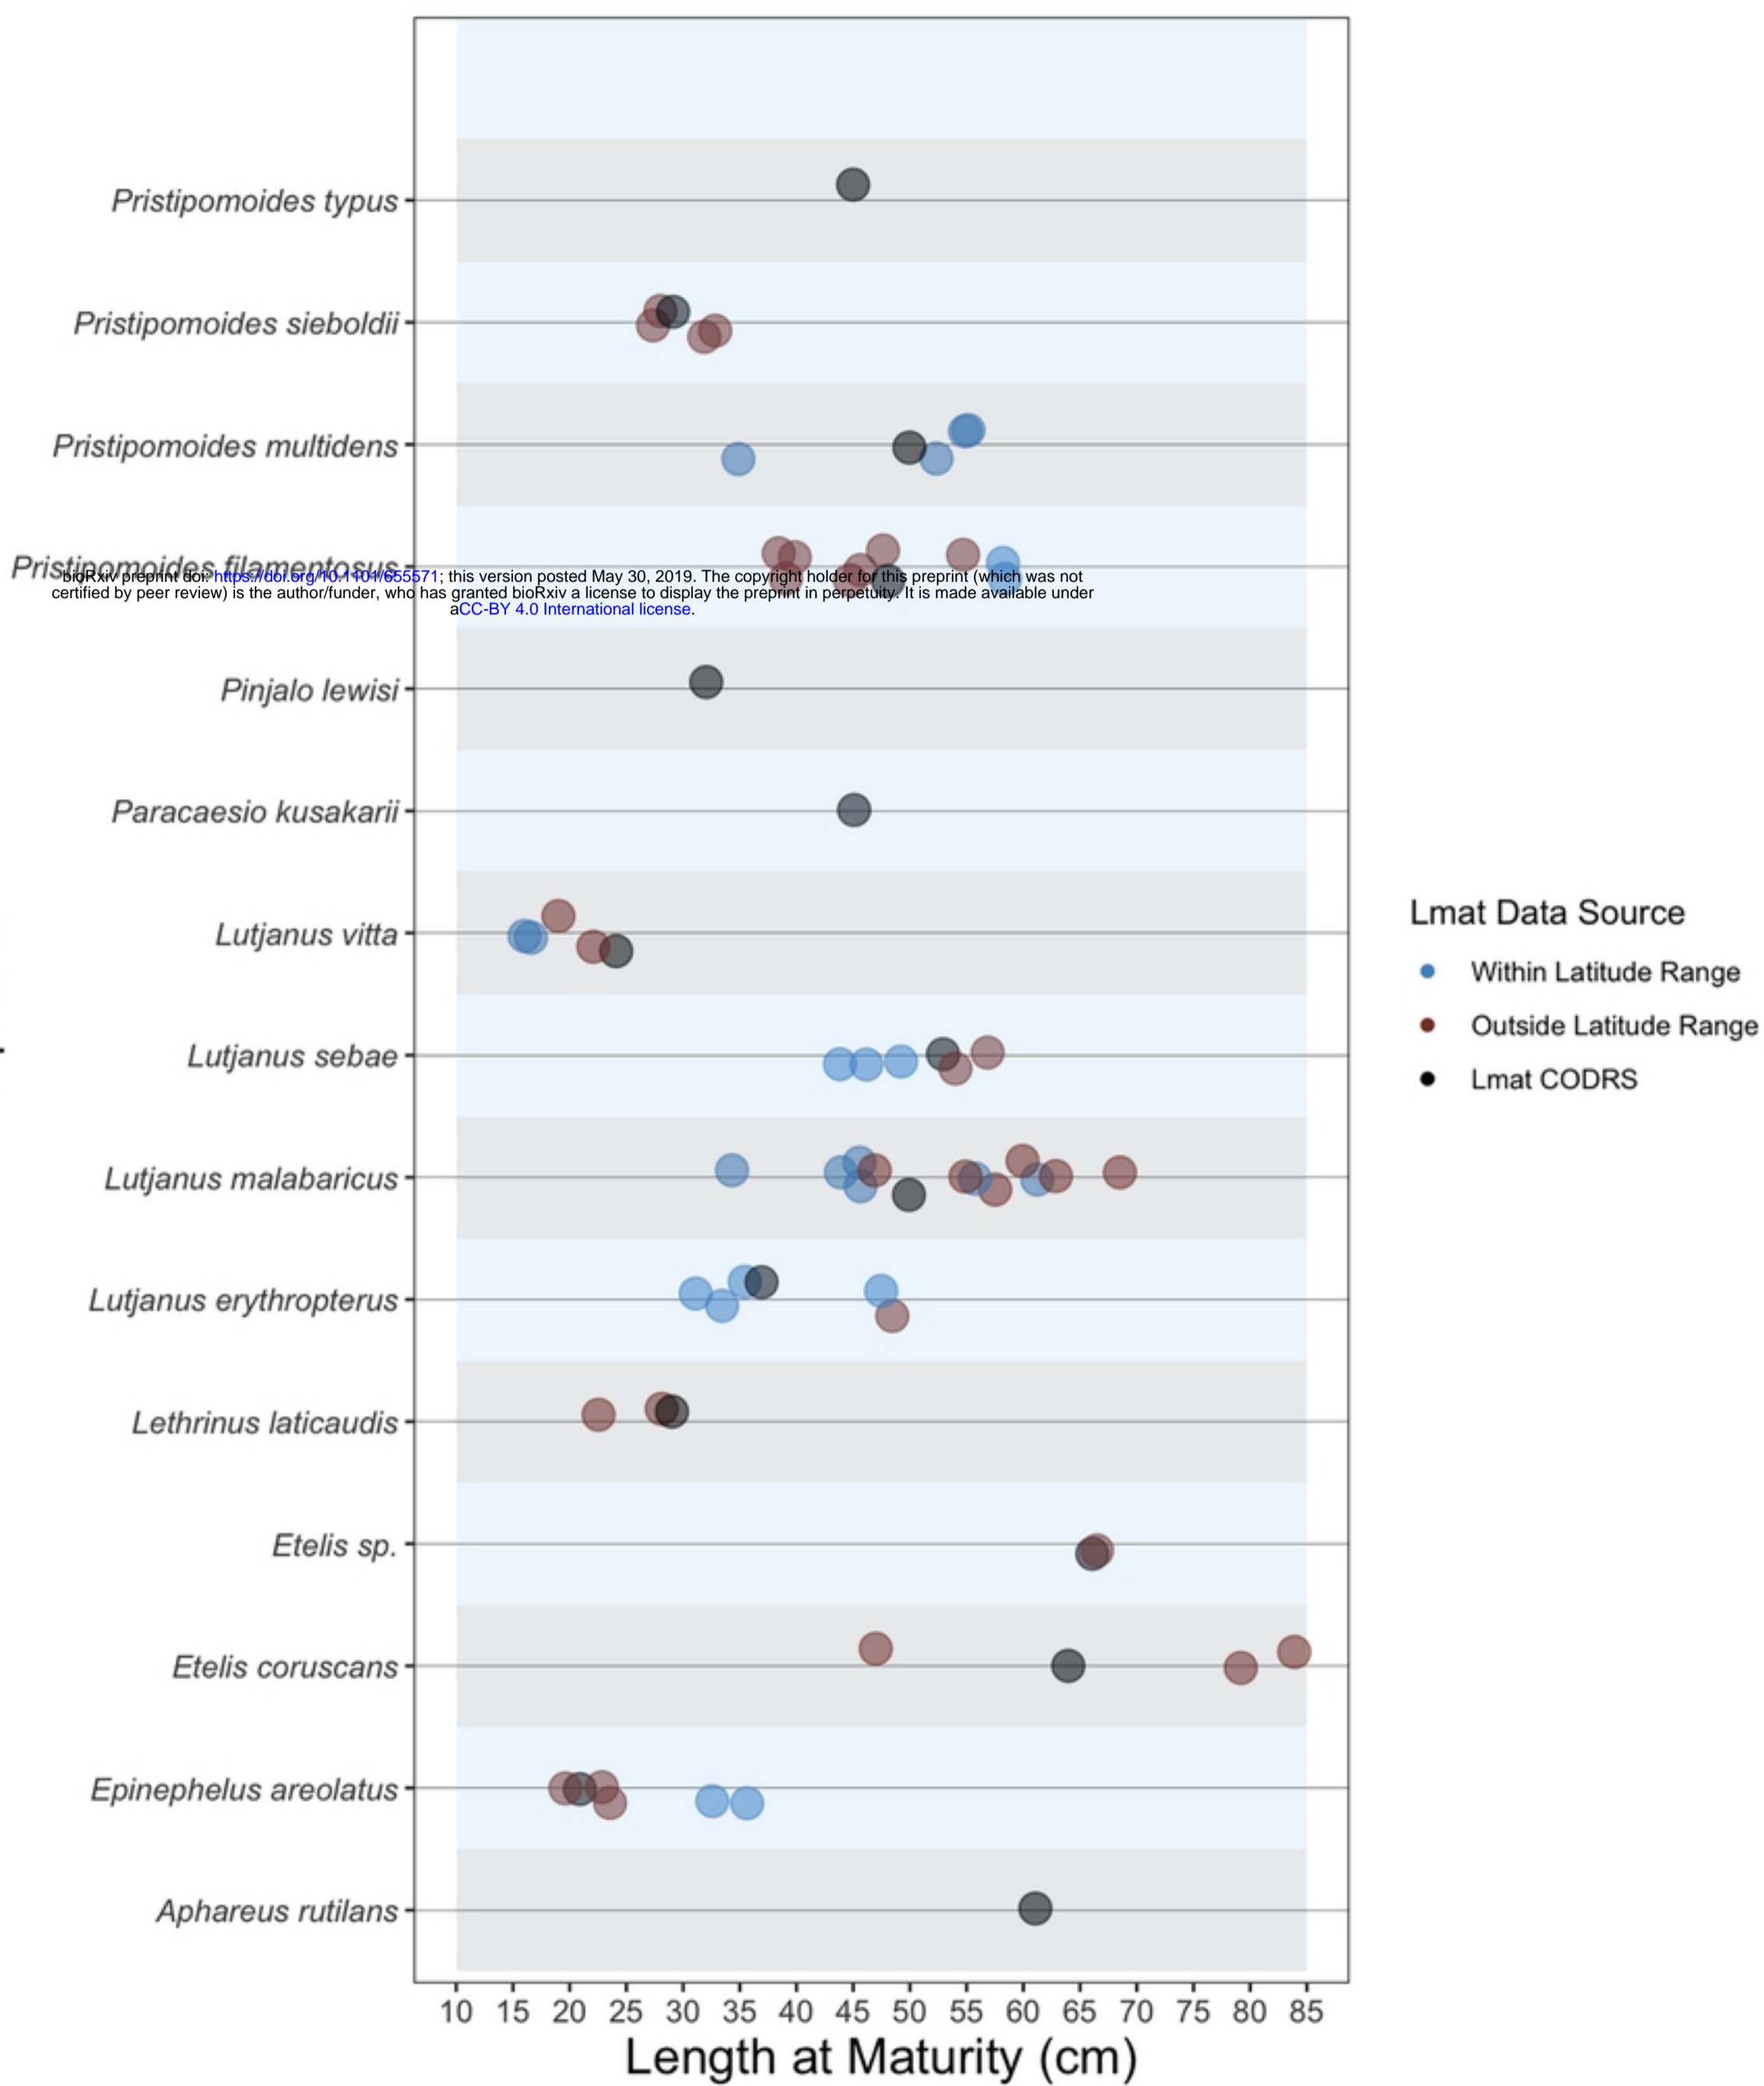

Figure 5
